# Supplementary material for: Novel Antineoplastic Inducers of Mitochondrial Apoptosis in Human Cancer Cells
Source: MDPI journal article supplement (doi:10.3390/molecules29040914), 2024-02-19
Supplement: s1 [file s1]

# Supplementary Information

## Novel Antineoplastic Inducers of Mitochondrial Apoptosis in Human Cancer Cells

Andreas J. Kesel<sup>1,\*</sup>

<sup>1</sup>Chammünsterstr. 47, D-81827 München, Bavaria/Bayern, Germany

**\*Corresponding author:** Andreas J. Kesel, Chammünsterstr. 47, D-81827 München, Bavaria/Bayern, Germany; Phone: +49 (0)176-87974849; E-mail: [andreasj.kesel@gmx.de](mailto:andreasj.kesel@gmx.de)

# Table of Contents

|                                                                                                                                                                                                                                                                                                                      |    |
|----------------------------------------------------------------------------------------------------------------------------------------------------------------------------------------------------------------------------------------------------------------------------------------------------------------------|----|
| <b>Figure S1.</b> The 400.13 MHz $^1\text{H}$ -NMR spectrum (in $\text{DMSO-}d_6$ ) of the salt-containing compound <b>1 (PENTA)</b> _____                                                                                                                                                                           | 6  |
| <b>Figure S2.</b> The 100.62 MHz $^{13}\text{C}$ -NMR spectrum (in $\text{DMSO-}d_6$ ) of the salt-containing compound <b>1 (PENTA)</b> _____                                                                                                                                                                        | 7  |
| <b>Figure S3.</b> The <i>Fourier</i> -transform infrared (FT-IR) absorption spectra of the salt-containing compound <b>1 (PENTA)</b> and of the reference substance amantadine hydrochloride (1-adamantanammonium chloride)_____                                                                                     | 8  |
| <b>Figure S4.</b> The 100.62 MHz $^{13}\text{C}$ - <u>D</u> istortionless <u>E</u> nhancement by <u>P</u> olarization <u>T</u> ransfer Including Detection of <u>Q</u> uaternary Nuclei (DEPTQ) (DEPTQ $^{13}\text{C}$ -NMR) spectrum (in $\text{DMSO-}d_6$ ) of the salt-containing compound <b>1 (PENTA)</b> _____ | 9  |
| <b>Figure S5.</b> The 400.13 MHz gradient-selected <u>C</u> orrelation <u>S</u> pectroscopy (gs-COSY) two-dimensional $^1\text{H}$ - $^1\text{H}$ -correlation spectrum (in $\text{DMSO-}d_6$ ) of the salt-containing compound <b>1 (PENTA)</b> _____                                                               | 10 |
| <b>Figure S6.</b> The 400.13/100.62 MHz gradient-selected <u>H</u> eteronuclear <u>M</u> ultiple <u>Q</u> uantum <u>C</u> oherence (gs-HMQC) two-dimensional $^1\text{H}$ - $^{13}\text{C}$ -correlation spectrum (in $\text{DMSO-}d_6$ ) of the salt-containing compound <b>1 (PENTA)</b> _____                     | 11 |
| <b>Figure S7.</b> The 400.13/100.62 MHz gradient-selected <u>H</u> eteronuclear <u>M</u> ultiple <u>B</u> ond <u>C</u> orrelation (gs-HMBC) two-dimensional $^1\text{H}$ - $^{13}\text{C}$ -correlation spectrum (in $\text{DMSO-}d_6$ ) of the salt-containing compound <b>1 (PENTA)</b> _____                      | 12 |

**Figure S8.** The *Fourier*-transform infrared (FT-IR) absorption spectra of the colchic(in)oid 10-(2-carbamothioylhydrazinyl)-10-demethoxycolchicine monohydrate  $\times \frac{2}{3}$  (ethyl acetate) = compound **2**, and of the reference substance (-)-colchicine sesquihydrate\_\_\_\_\_ 13

**Figure S9.** One formula unit ( $Z = 2$ ) in the monoclinic (space group  $P2_1$ ) unit cell of compound **2** crystallized as hydrate (ethyl acetate) solvate\_\_\_\_\_ 14

**Figure S10.** Crystal packing showing the hydrogen bonds (H bonds, shown as colored dashed lines) in the monoclinic (space group  $P2_1$ ) unit cell ( $Z = 2$ ) of compound **2** crystallized as hydrate (ethyl acetate) solvate\_\_\_\_\_ 15

**Figure S11.** The ESI mass spectrum of the separated HPLC peak region 7.842–7.925 min with the ammonium trication ionization species of compound **3**\_\_\_\_\_ 16

**Figure S12.** The ESI mass spectrum of the separated HPLC peak region 8.508–8.558 min with the ammonium dication ionization species of compound **3**\_\_\_\_\_ 17

**Figure S13.** The ESI mass spectrum of the separated HPLC peak region 8.608–8.658 min with the ammonium monocation ionization species of compound **3**\_\_\_\_\_ 18

**Figure S14.** The ESI mass spectrum of the separated HPLC peak region 8.691–8.741 min with the ammonium monocation ionization species of compound **3**\_\_\_\_\_ 19

**Figure S15.** The ESI mass spectrum of the separated HPLC peak region 9.024–9.074 min with the ylide dication ionization species of compound **3**\_\_\_\_\_ 20

**Figure S16.** The ESI mass spectrum of the separated HPLC peak region 9.740–9.973 min with the ylide monocation ionization species of compound **3**\_\_\_\_\_ 21

|                                                                                                                                                                                                                                                                                     |       |
|-------------------------------------------------------------------------------------------------------------------------------------------------------------------------------------------------------------------------------------------------------------------------------------|-------|
| <b>Figure S17.</b> The ESI mass spectrum of the separated HPLC peak region 13.386–13.453 min with the neutral ylide ionization species of compound <b>3</b> _____                                                                                                                   | 22    |
| <b>Figure S18.</b> The enlargement of the ESI mass spectrum peak <i>m/z</i> 483.2727 of the separated HPLC peak region 9.024–9.074 min with the ylide dication ionization species of compound <b>3</b> _____                                                                        | 23    |
| <b>Figure S19.</b> The enlargement of the ESI mass spectrum peak <i>m/z</i> 609.8643 of the separated HPLC peak region 9.757–9.973 min with the ylide monocation ionization species of compound <b>3</b> _____                                                                      | 24    |
| <b>Figure S20.</b> The enlargement of the ESI mass spectrum peak <i>m/z</i> 356.6814 of the separated HPLC peak region 8.706–8.758 min with the ammonium monocation ionization species of compound <b>3</b> _____                                                                   | 25    |
| <b>Table S1.</b> National Cancer Institute (NCI) Developmental Therapeutics Program (DTP) 60-cancer cell 5-dose testing of compound <b>1</b> ( <b>PT162</b> ), compound <b>2</b> ( <b>PT166</b> ), and compound <b>3</b> ( <b>PT167</b> ) (with cellular p53 status)_____           | 26–30 |
| <b>Figure S21.</b> Graphic allover presentation of the antineoplastic activity in the National Cancer Institute (NCI) Developmental Therapeutics Program (DTP) 60-cancer cell 5-dose testing exhibited by the pure drug compound <b>1</b> ( <b>PT162</b> , <b>NSC 796018</b> )_____ | 31    |
| <b>Figure S22.</b> Tabular list of the antineoplastic activity exhibited by the pure drug compound <b>1</b> ( <b>PT162</b> , <b>NSC 796018</b> ) in the National Cancer Institute (NCI) Developmental Therapeutics Program (DTP) 60-cancer cell 5-dose testing_____                 | 32    |
| <b>Figure S23.</b> Graphic table presentation of the antineoplastic activity exhibited by the pure drug compound <b>1</b> ( <b>PT162</b> , <b>NSC 796018</b> ) in the National Cancer Institute (NCI) Developmental Therapeutics Program (DTP) 60-cancer cell 5-dose testing_____   | 33    |

**Figure S24.** Graphic allover presentation of the antineoplastic activity in the National Cancer Institute (NCI) Developmental Therapeutics Program (DTP) 60-cancer cell 5-dose testing exhibited by the drug compound **2 (PT166, NSC 750423)**\_\_\_\_\_ 35

**Figure S25.** Tabular list of the antineoplastic activity exhibited by the drug compound **2 (PT166, NSC 750423)** in the National Cancer Institute (NCI) Developmental Therapeutics Program (DTP) 60-cancer cell 5-dose testing\_\_\_\_\_ 36

**Figure S26.** Graphic table presentation of the antineoplastic activity exhibited by the drug compound **2 (PT166, NSC 750423)** in the National Cancer Institute (NCI) Developmental Therapeutics Program (DTP) 60-cancer cell 5-dose testing\_\_\_\_\_ 37

**Figure S27.** Graphic allover presentation of the antineoplastic activity in the National Cancer Institute (NCI) Developmental Therapeutics Program (DTP) 60-cancer cell 5-dose testing exhibited by the drug compound **3 (PT167, NSC 799315)**\_\_\_\_\_ 39

**Figure S28.** Tabular list of the antineoplastic activity exhibited by the drug compound **3 (PT167, NSC 799315)** in the National Cancer Institute (NCI) Developmental Therapeutics Program (DTP) 60-cancer cell 5-dose testing\_\_\_\_\_ 40

**Figure S29.** Graphic table presentation of the antineoplastic activity exhibited by the drug compound **3 (PT167, NSC 799315)** in the National Cancer Institute (NCI) Developmental Therapeutics Program (DTP) 60-cancer cell 5-dose testing\_\_\_\_\_ 41

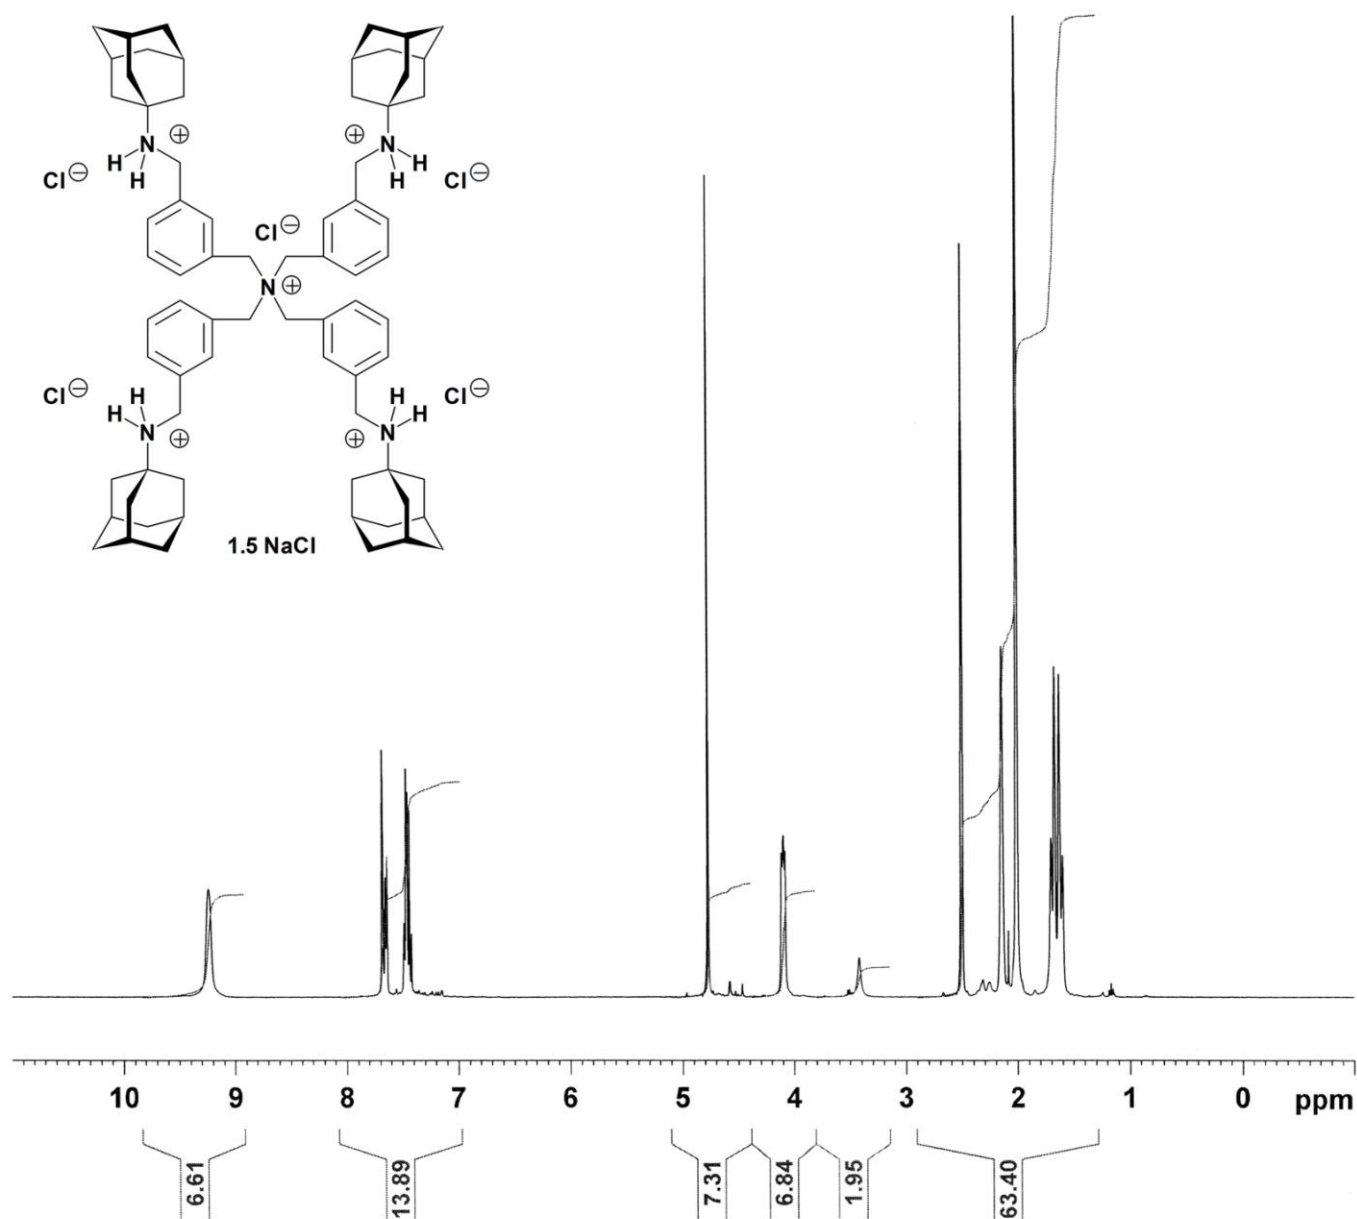

**Figure S1.** The 400.13 MHz <sup>1</sup>H-NMR spectrum (in DMSO-*d*<sub>6</sub>) of the salt-containing polyammonium polycation tetrakis{3-[(tricyclo[3.3.1.1<sup>3,7</sup>] decan-1-ammonio)methyl]benzyl}ammonium pentachloride × 1.5 (sodium chloride) = salt-containing compound **1** (**PENTA**).

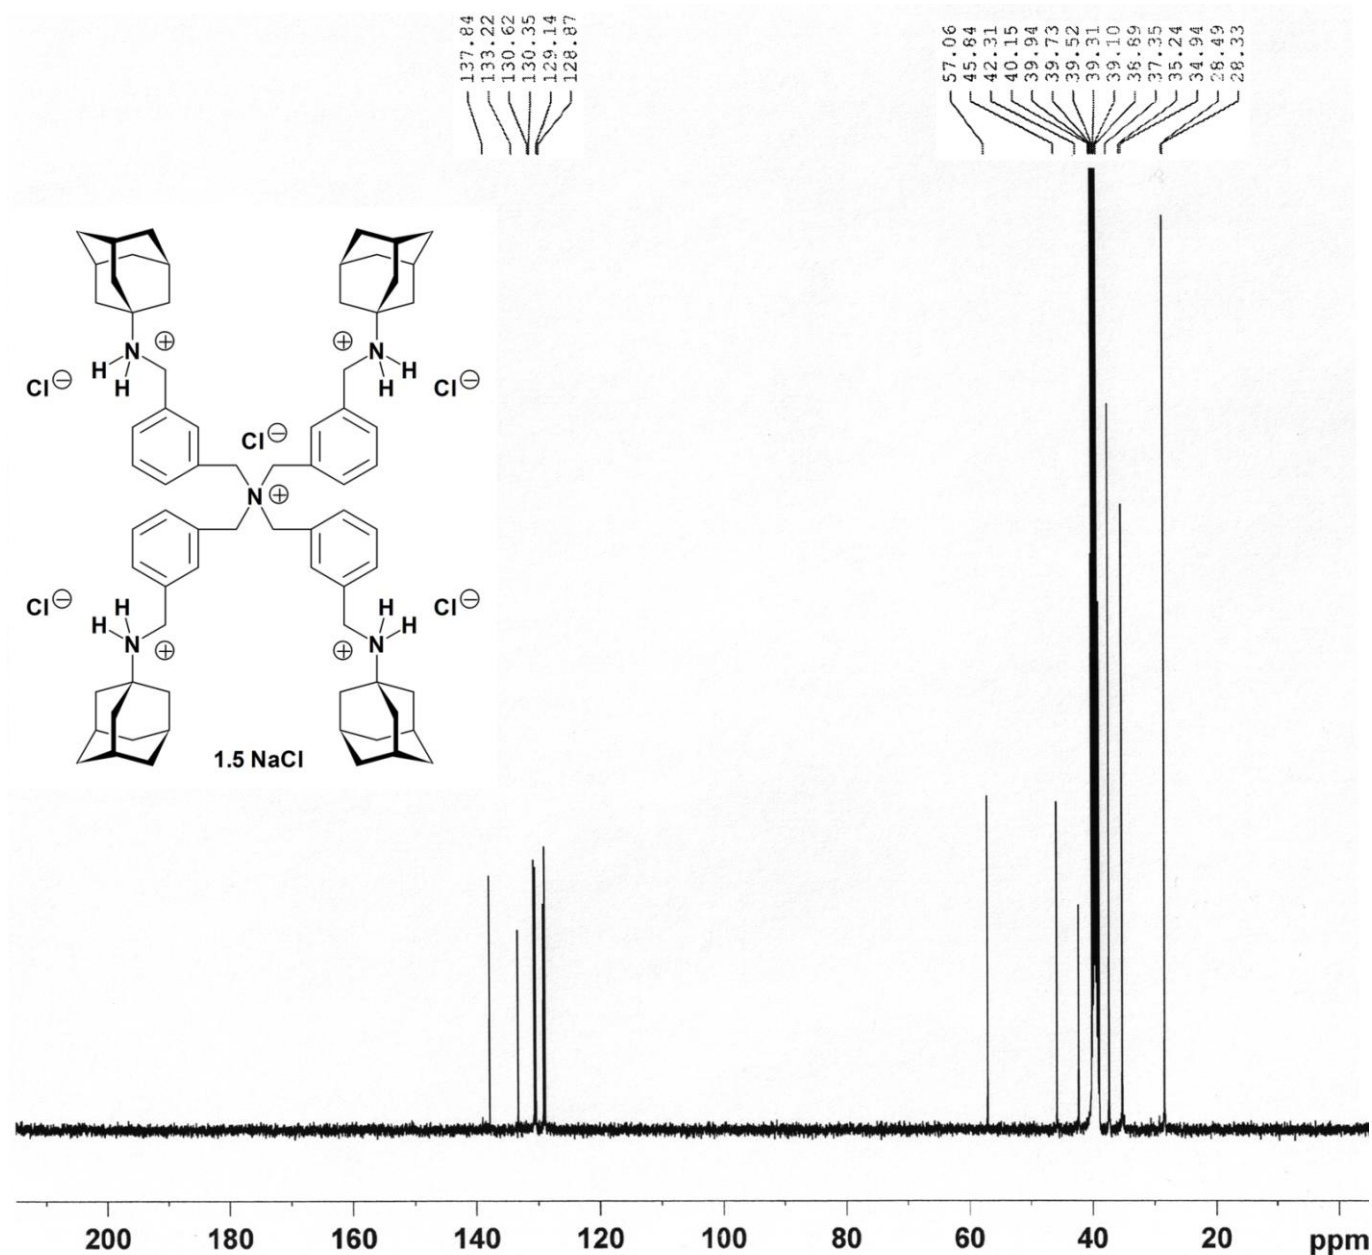

**Figure S2.** The 100.62 MHz <sup>13</sup>C-NMR spectrum (in DMSO-*d*<sub>6</sub>) of the salt-containing polyammonium polycation tetrakis{3-[(tricyclo[3.3.1.1<sup>3,7</sup>]decan-1-ammonio)methyl]benzyl} ammonium pentachloride × 1.5 (sodium chloride) = salt-containing compound **1 (PENTA)**.

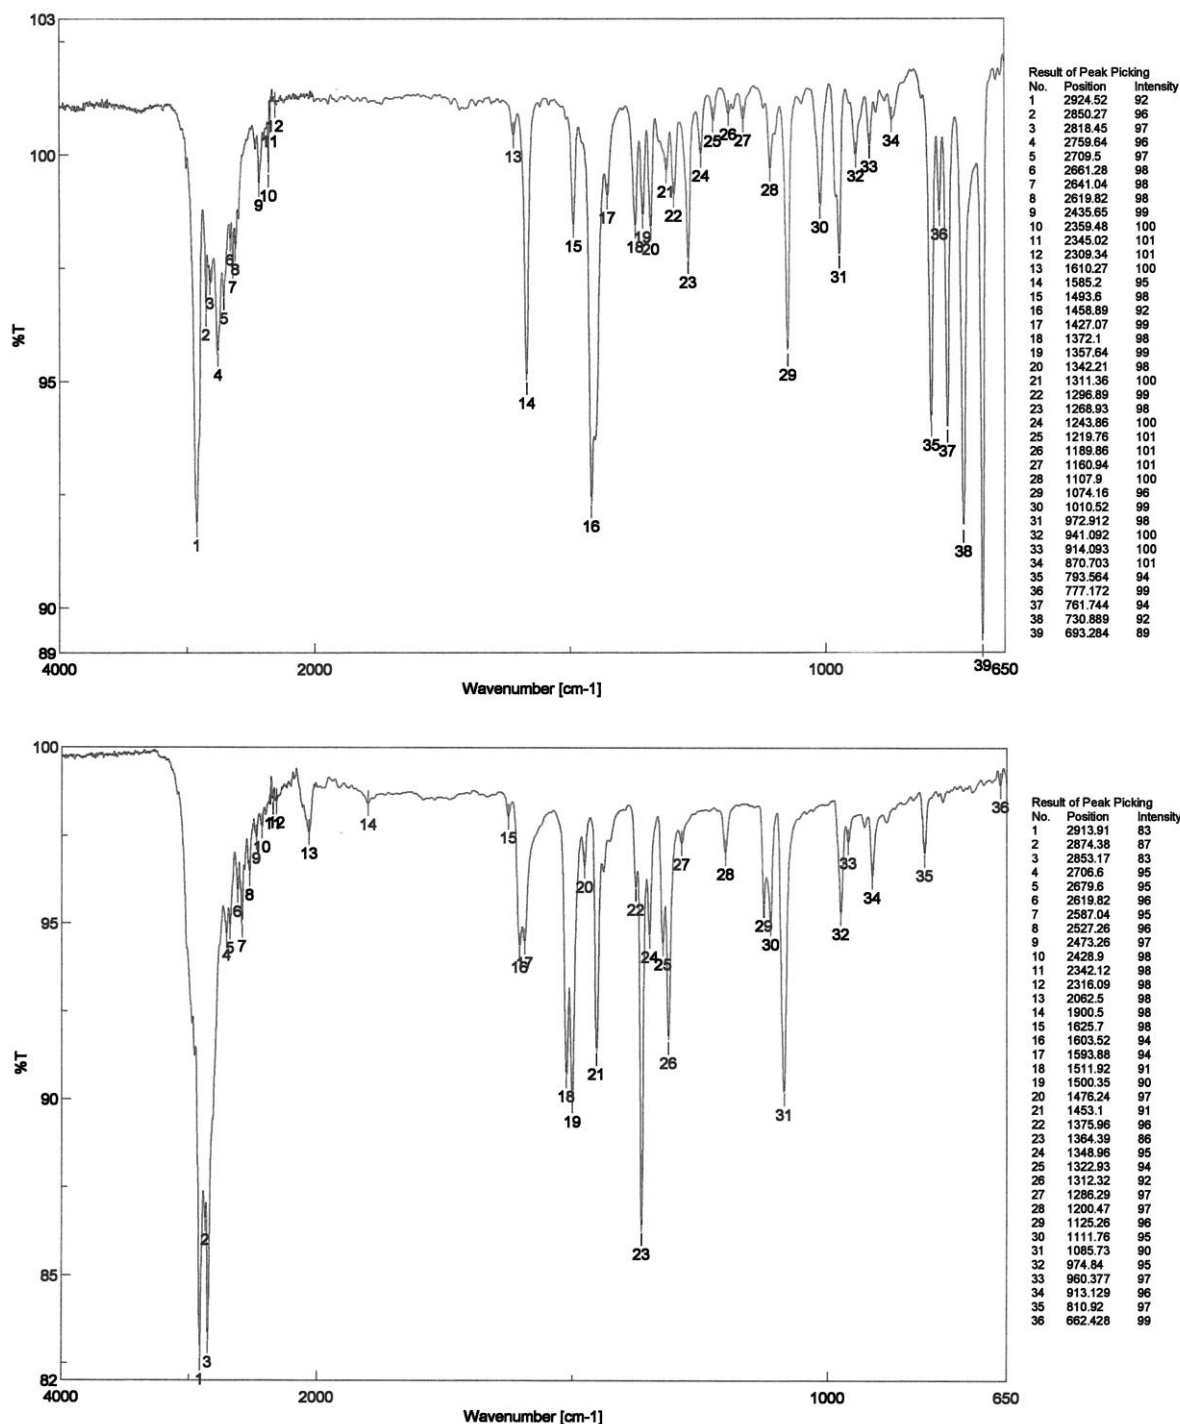

**Figure S3.** The *Fourier*-transform infrared (FT-IR) absorption spectra of the salt-containing tetrakis{3-[(tricyclo[3.3.1.1<sup>3,7</sup>]decan-1-ammonio)methyl]benzyl}ammonium pentachloride  $\times$  1.5 (sodium chloride) = salt-containing compound **1 (PENTA)** (top), and of the reference substance amantadine hydrochloride (1-adamantanammonium chloride) (bottom), both recorded with neat substance.



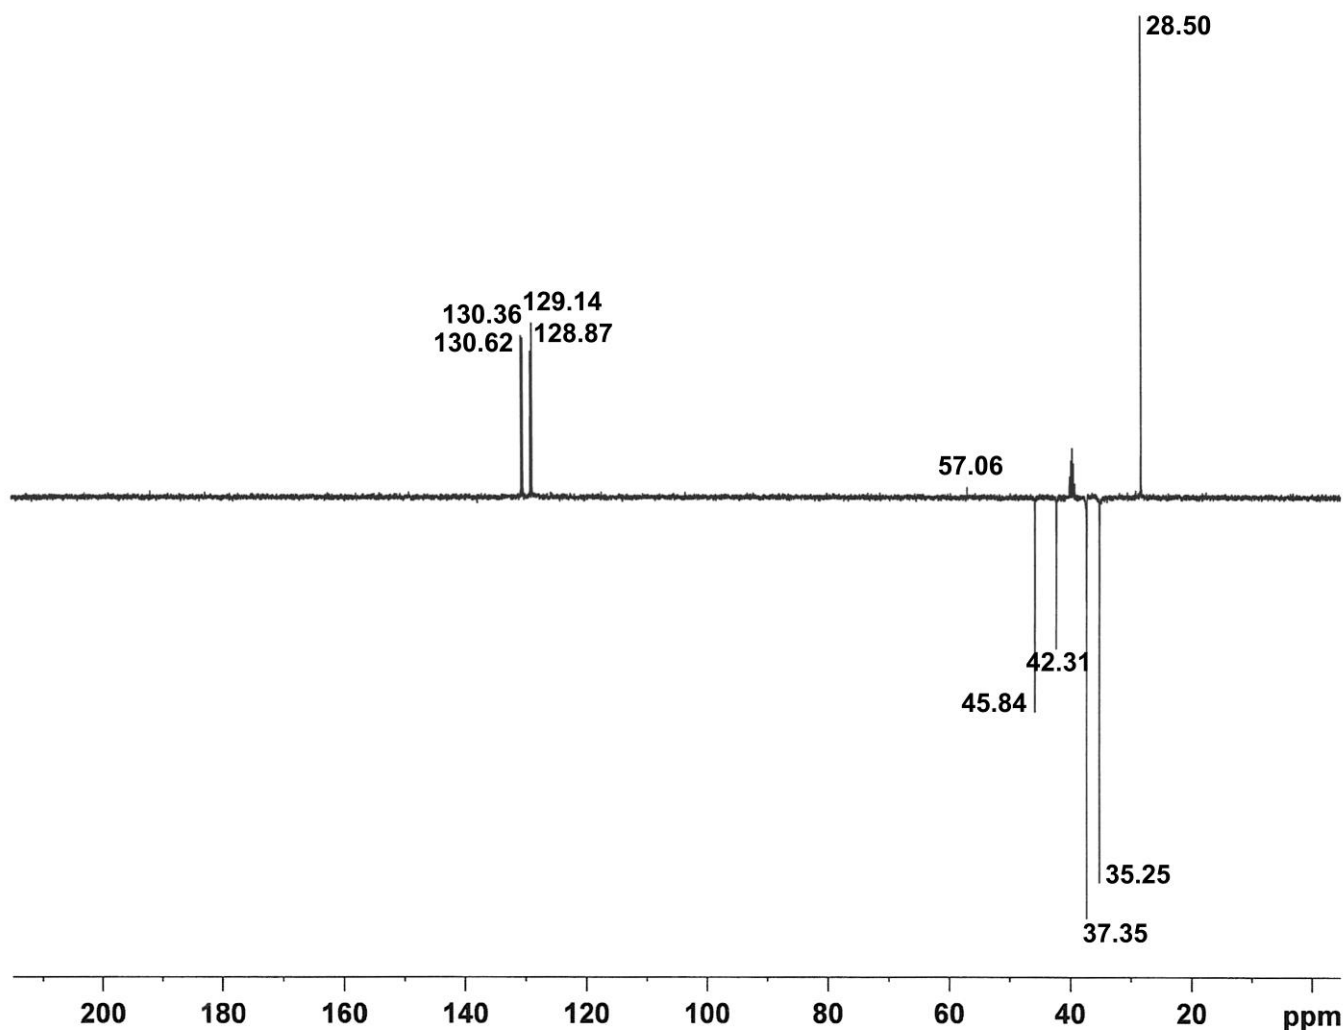

**Figure S4.** The 100.62 MHz  $^{13}\text{C}$ -Distortionless Enhancement by Polarization Transfer Including Detection of Quaternary Nuclei (DEPTQ) (DEPTQ  $^{13}\text{C}$ -NMR) spectrum (in  $\text{DMSO}-d_6$ ) of the salt-containing polyammonium polycation tetrakis{3-[(tricyclo[3.3.1.1<sup>3,7</sup>]decan-1-ammonio)methyl]benzyl}ammonium pentachloride  $\times$  1.5 (sodium chloride) = salt-containing compound **1** (**PENTA**). Quaternary carbons (C), methine (CH) and methyl ( $\text{CH}_3$ ) group moieties are of positive phase, methylene ( $\text{CH}_2$ ) group moieties are of negative phase. The quaternary carbon  $\delta$  57.06 ppm ( $\alpha$ -C) is weak in intensity. The aromatic quaternary carbons  $\delta$  133.22 ppm (C-3) and 137.84 ppm (C-1) could not being detected.

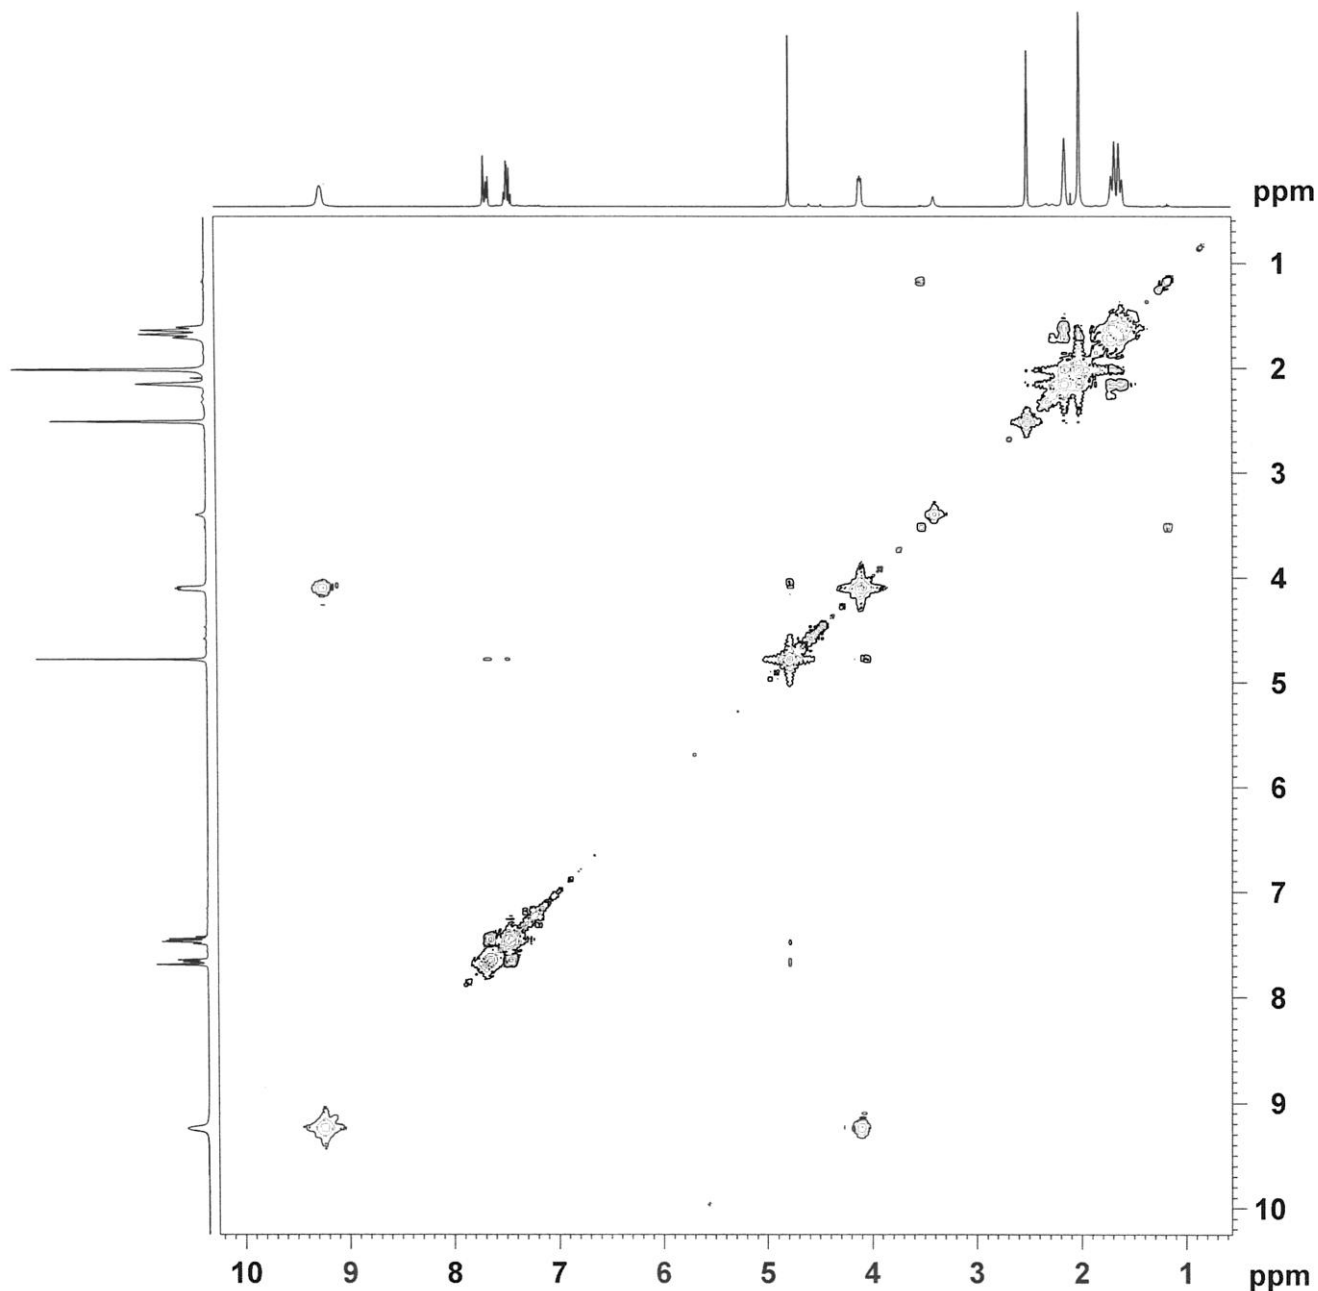

**Figure S5.** The 400.13 MHz gradient-selected Correlation Spectroscopy (gs-COSY) two-dimensional  $^1\text{H}$ - $^1\text{H}$ -correlation spectrum (in  $\text{DMSO}-d_6$ ) of the salt-containing polyammonium polycation tetrakis{3-[(tricyclo[3.3.1.1<sup>3,7</sup>]decan-1-ammonio)methyl]benzyl}ammonium pentachloride  $\times 1.5$  (sodium chloride) = salt-containing compound **1** (**PENTA**).

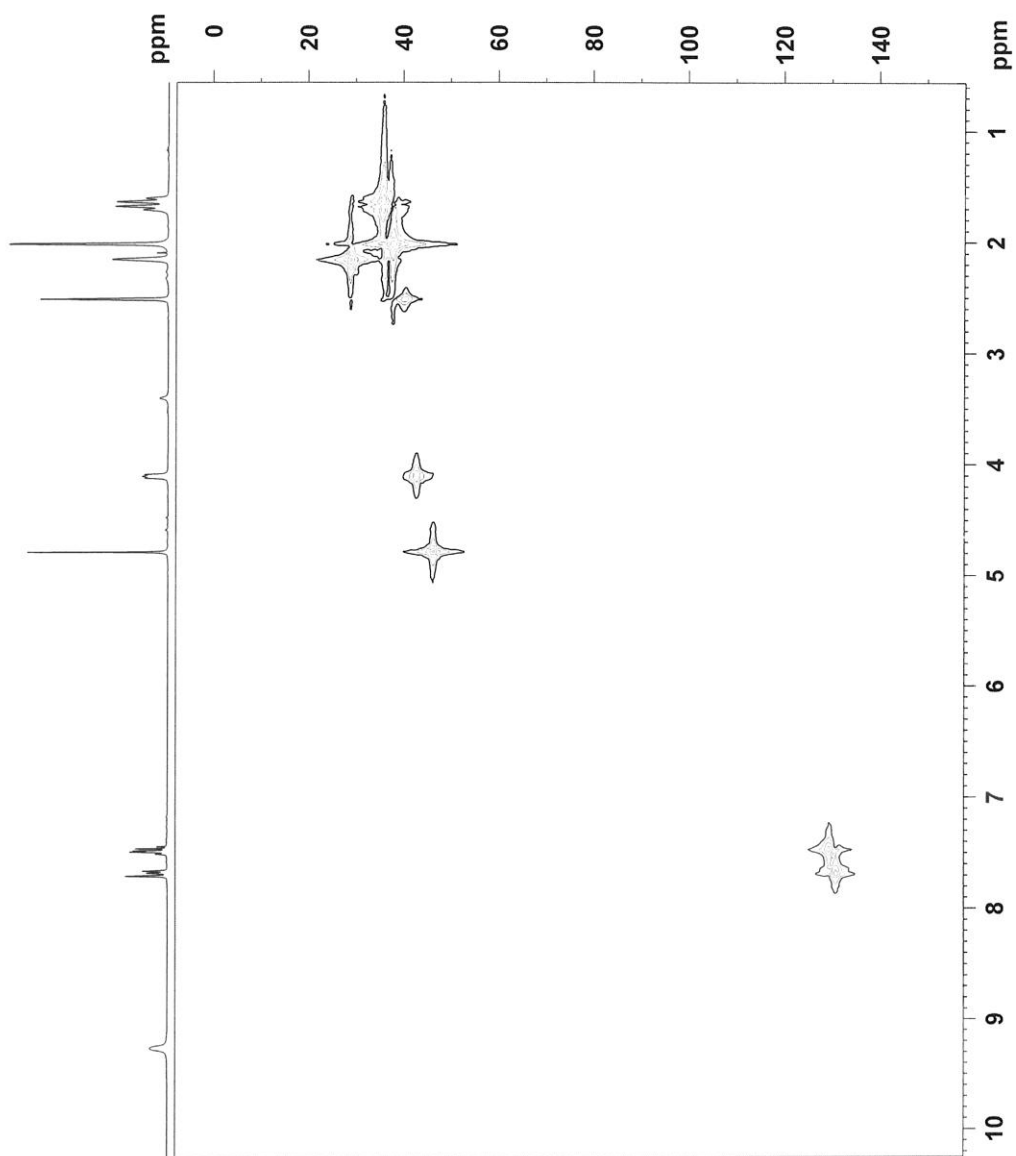

**Figure S6.** The 400.13/100.62 MHz gradient-selected Heteronuclear Multiple Quantum Coherence (gs-HMQC) two-dimensional  $^1\text{H}$ - $^{13}\text{C}$ -correlation spectrum (in  $\text{DMSO-}d_6$ ) of the salt-containing polyammonium polycation tetrakis{3-[(tricyclo[3.3.1.1<sup>3,7</sup>]decan-1-ammonio)methyl]benzyl}ammonium pentachloride  $\times 1.5$  (sodium chloride) = salt-containing compound **1** (**PENTA**).

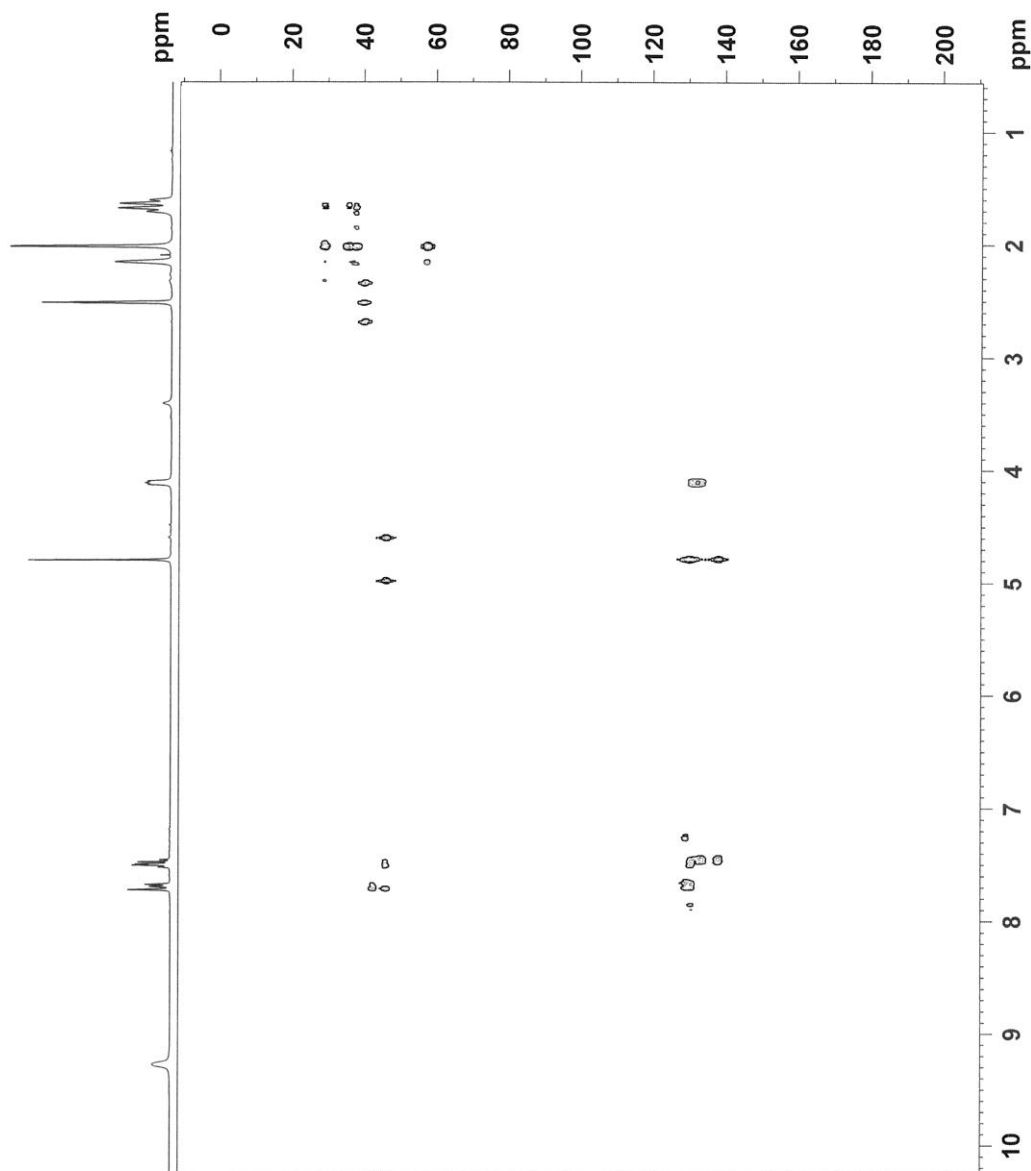

**Figure S7.** The 400.13/100.62 MHz gradient-selected Heteronuclear Multiple Bond Correlation (gs-HMBC) two-dimensional  $^1\text{H}$ - $^{13}\text{C}$ -correlation spectrum (in  $\text{DMSO}-d_6$ ) of the salt-containing polyammonium polycation tetrakis{3-[(tricyclo[3.3.1.1<sup>3,7</sup>]decan-1-ammonio)methyl]benzyl}ammonium pentachloride  $\times$  1.5 (sodium chloride) = salt-containing compound **1** (**PENTA**).

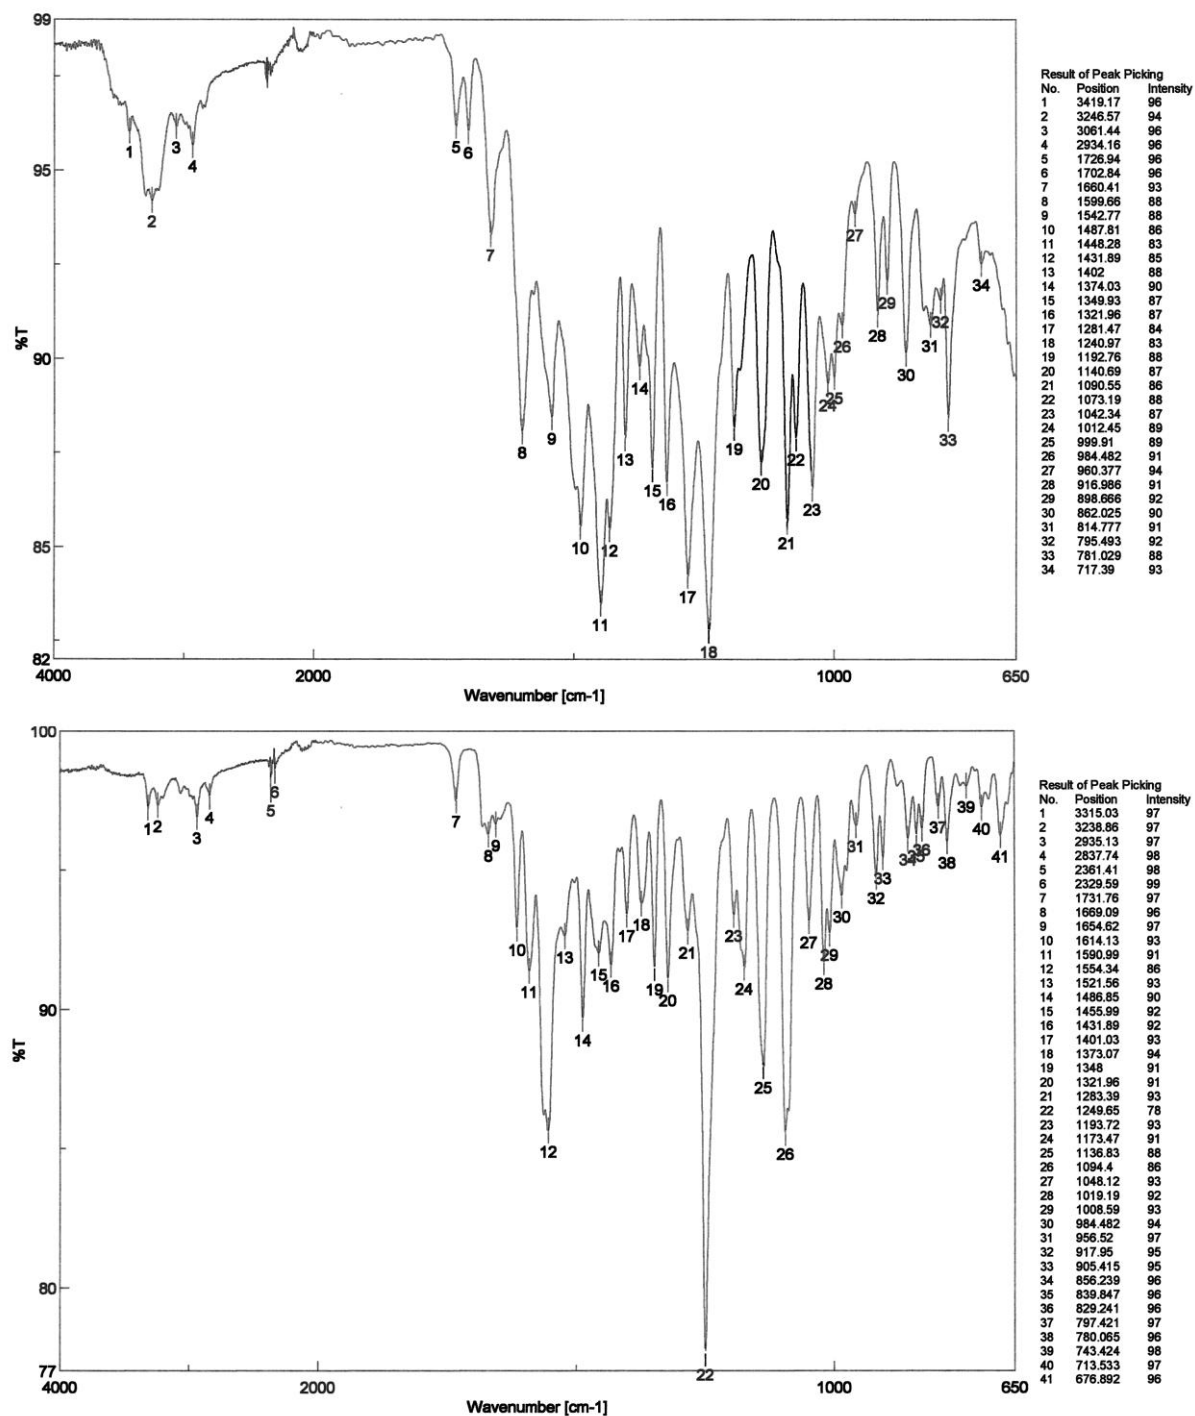

**Figure S8.** The *Fourier*-transform infrared (FT-IR) absorption spectra of the colchic(in)oid 10-(2-carbamothioylhydrazinyl)-10-demethoxycolchicine monohydrate  $\times \frac{2}{3}$  (ethyl acetate) = compound **2** (top), and of the reference substance (-)-colchicine sesquihydrate [(-)-colchicine  $\times 1\frac{1}{2}$  H<sub>2</sub>O] (bottom), both recorded with neat substance.

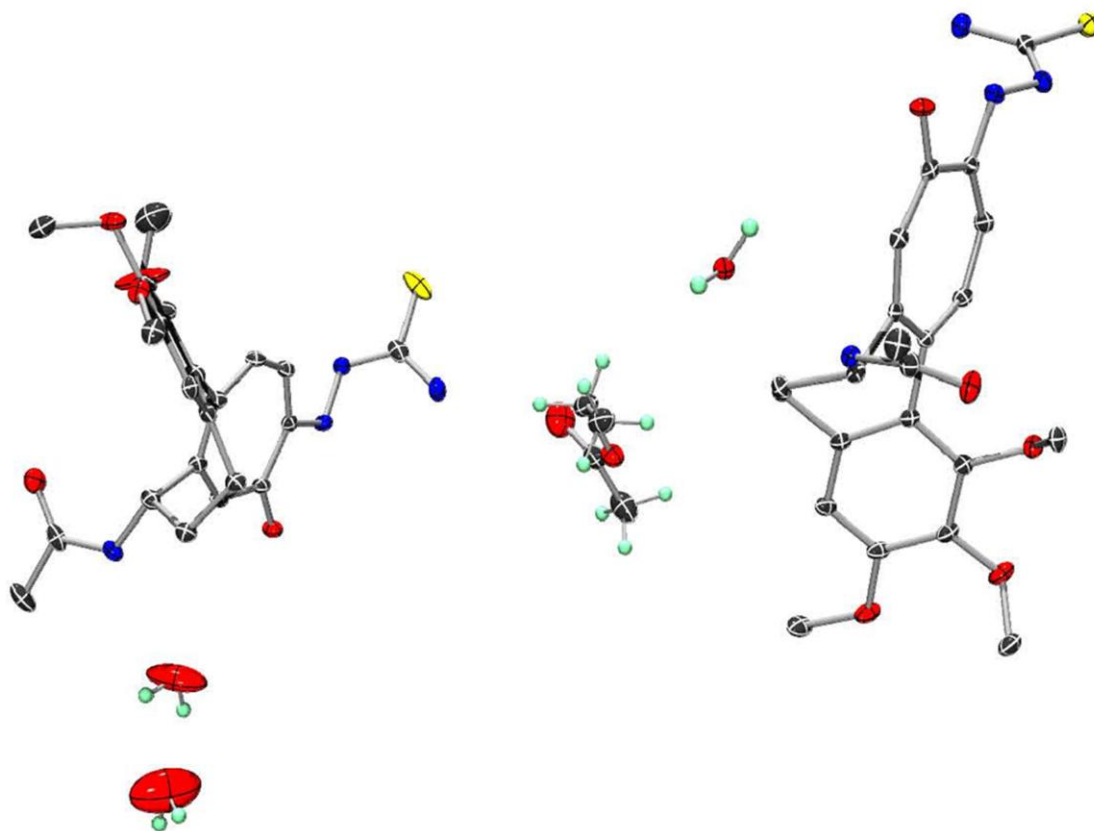

**Figure S9.** One formula unit ( $Z = 2$ ) in the monoclinic (space group  $P2_1$ ) unit cell of compound **2** (**PT166**) ( $\text{C}_{24}\text{H}_{33}\text{N}_4\text{O}_{7.50}\text{S}$ ) crystallized as hydrate (ethyl acetate) solvate ( $2 \text{ C}_{22}\text{H}_{26}\text{N}_4\text{O}_5\text{S} \times 3 \text{ H}_2\text{O} \times \text{C}_4\text{H}_8\text{O}_2$ )  $\text{C}_{48}\text{H}_{66}\text{N}_8\text{O}_{15}\text{S}_2$  ( $M = 1059.21 \text{ g/mol}$ ) as found in the single crystal.

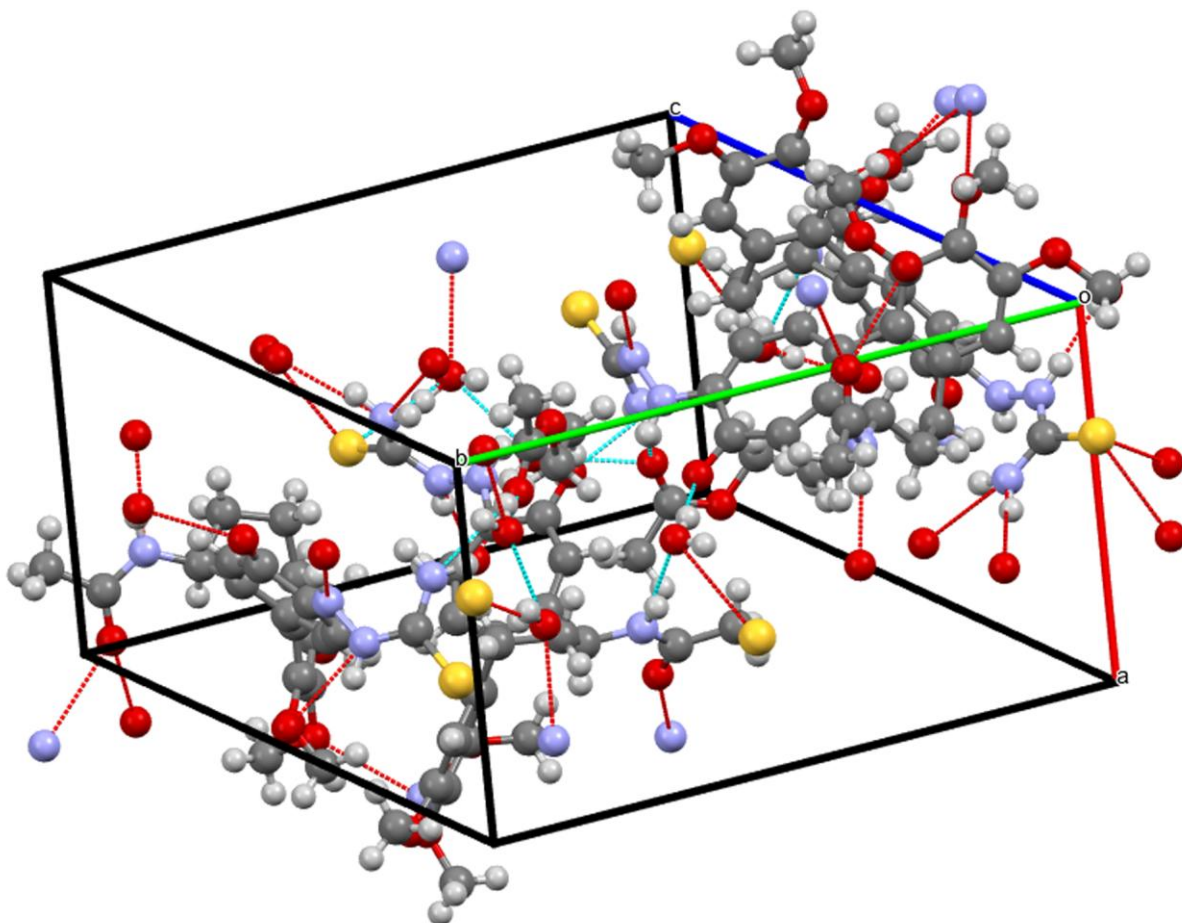

**Figure S10.** Crystal packing showing the hydrogen bonds (H bonds, shown as colored dashed lines) in the monoclinic (space group  $P2_1$ ) unit cell ( $Z = 2$ ) of compound **2** (**PT166**) crystallized as hydrate (ethyl acetate) solvate ( $2 \text{ C}_{22}\text{H}_{26}\text{N}_4\text{O}_5\text{S} \times 3 \text{ H}_2\text{O} \times \text{C}_4\text{H}_8\text{O}_2$ )  $\text{C}_{48}\text{H}_{66}\text{N}_8\text{O}_{15}\text{S}_2$  ( $M = 1059.21$  g/mol). Unit cell dimensions ( $a$ ,  $b$ ,  $c$  are indicated from the origin  $o$ ):  $a = 9.1886(5)$  Å,  $b = 20.9047(10)$  Å,  $c = 13.9841(7)$  Å,  $\alpha = 90.00^\circ$ ,  $\beta = 106.153(2)^\circ$ ,  $\gamma = 90.00^\circ$ ,  $V = 2580.1(2)$  Å<sup>3</sup>.

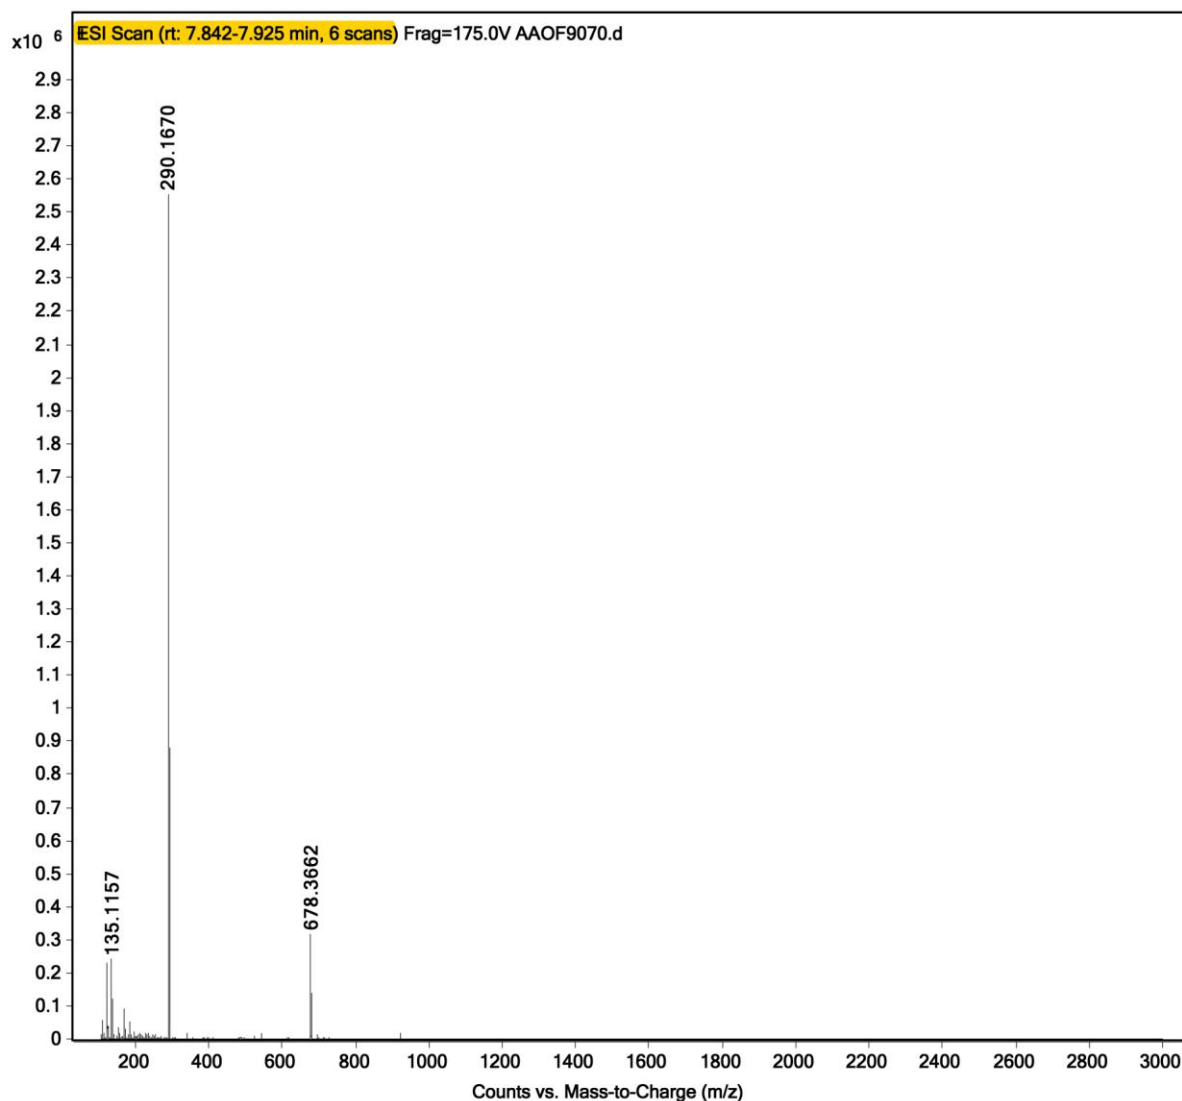

**Figure S11.** The ESI mass spectrum of the separated HPLC peak region 7.842–7.925 min (see Figure 15A) with the ammonium trication ionization species of compound **3**. The ESI–MS fragment peaks (relative intensity of the 100% base peak) were  $m/z$  290.1670 (100%), 678.3662 (12.5%), and 135.1157 (9.6%).



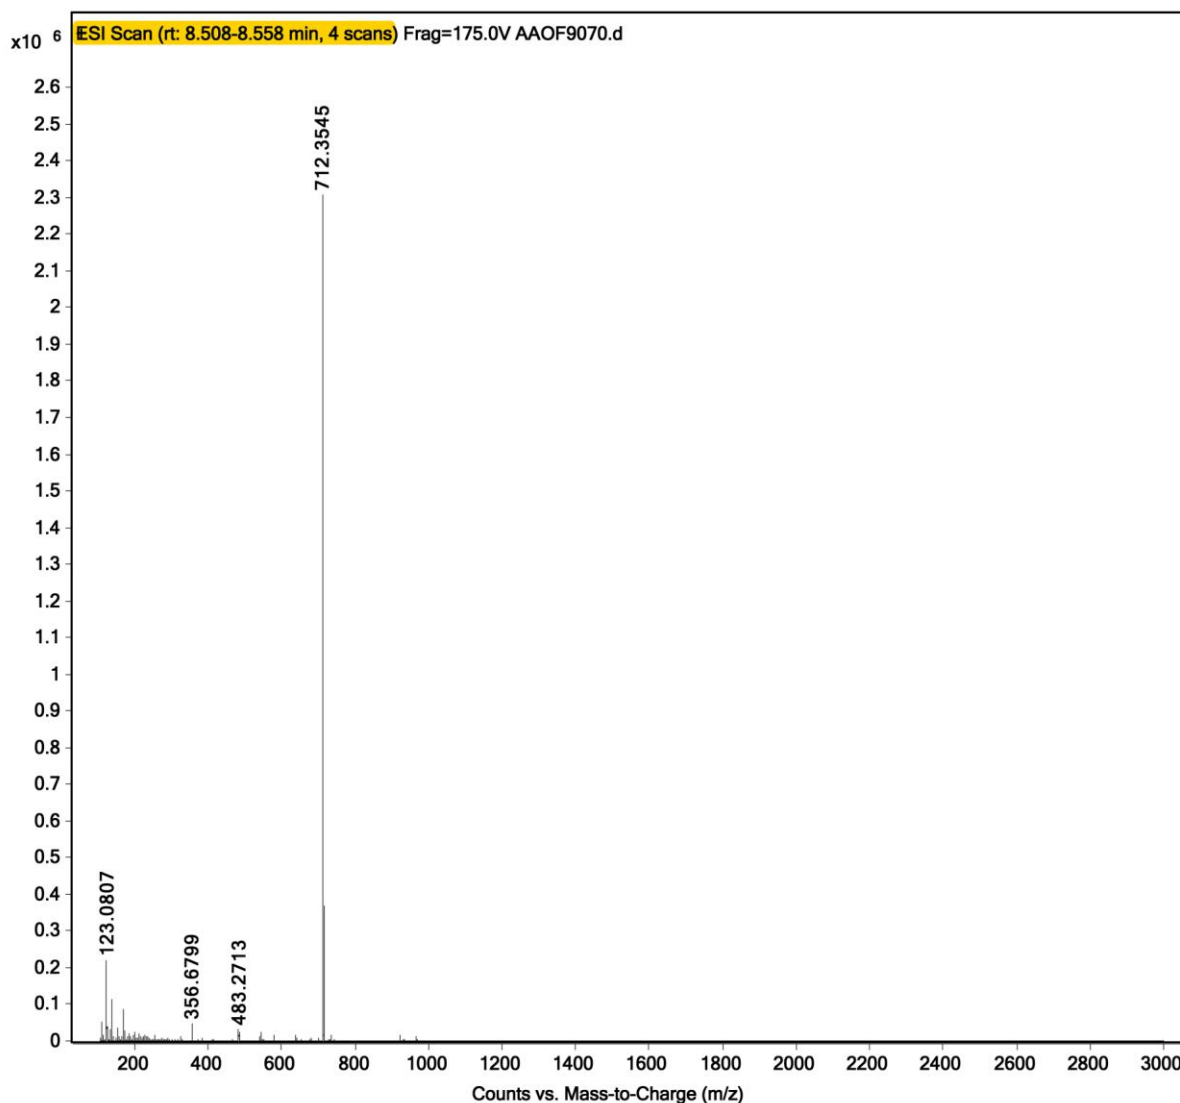

**Figure S12.** The ESI mass spectrum of the separated HPLC peak region 8.508–8.558 min (see Figure 15A) with the ammonium dication ionization species of compound **3**. The ESI–MS fragment peaks (relative intensity of the 100% base peak) were  $m/z$  712.3545 (100%), 123.0807 (16.5%), 356.6799 (2.1%), and 483.2713 (1.3%).

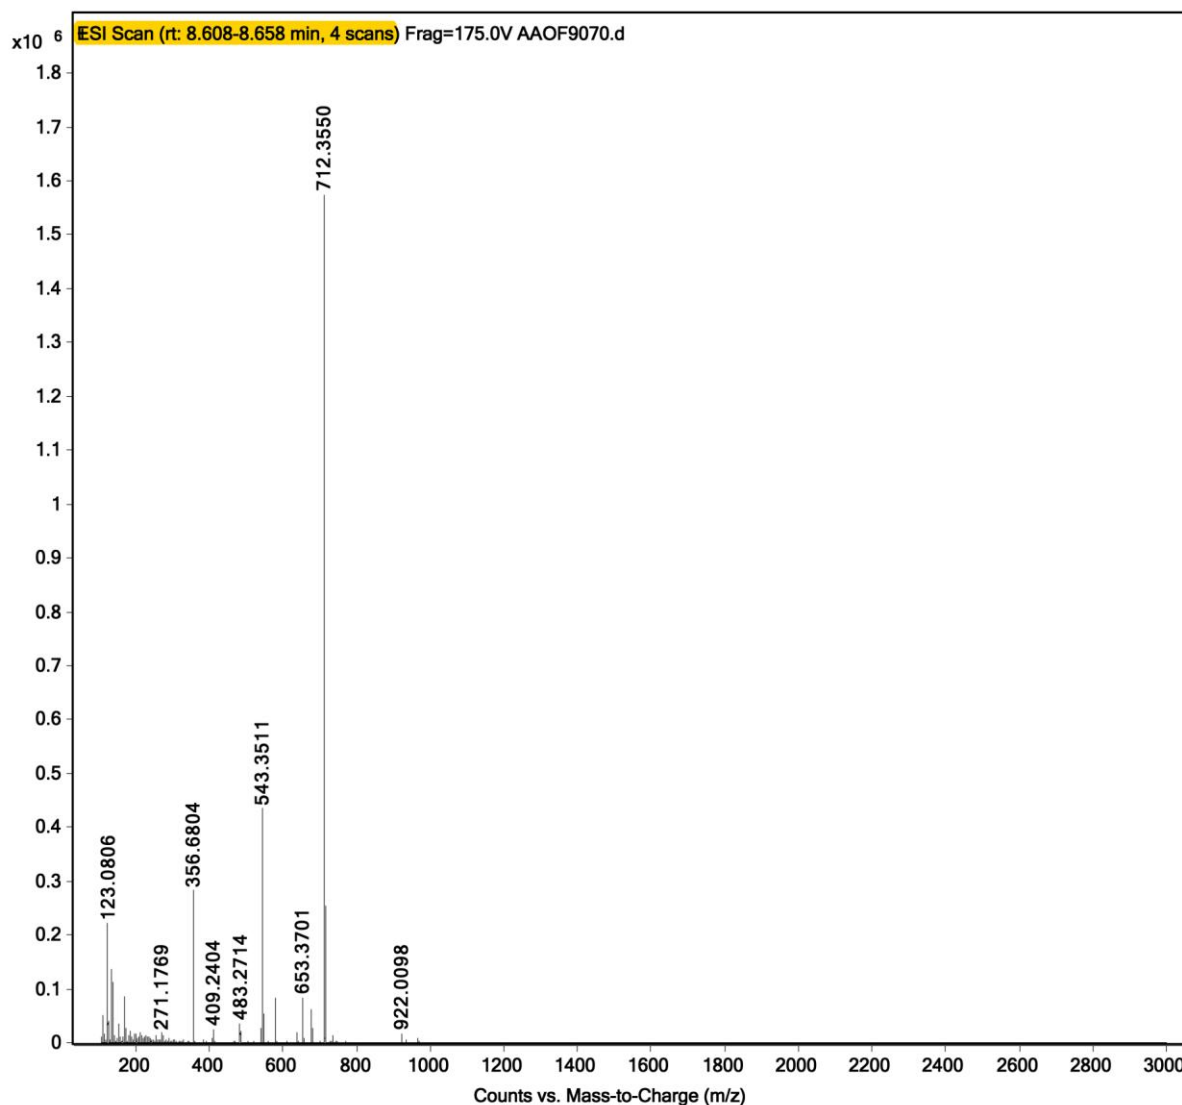

**Figure S13.** The ESI mass spectrum of the separated HPLC peak region 8.608–8.658 min (see Figure 15A) with the ammonium monocation ionization species of compound **3**. The ESI-MS fragment peaks (relative intensity of the 100% base peak) were  $m/z$  712.3550 (100%), 543.3511 (27.9%), 356.6804 (18.1%), 123.0806 (14.2%), 653.3701 (5.4%), 483.2714 (2.5%), and 409.2404 (1.7%). The  $m/z$  922.0098 is an internal control substance (reference cation) added to the analysis for auto-calibration of the mass spectrometer.

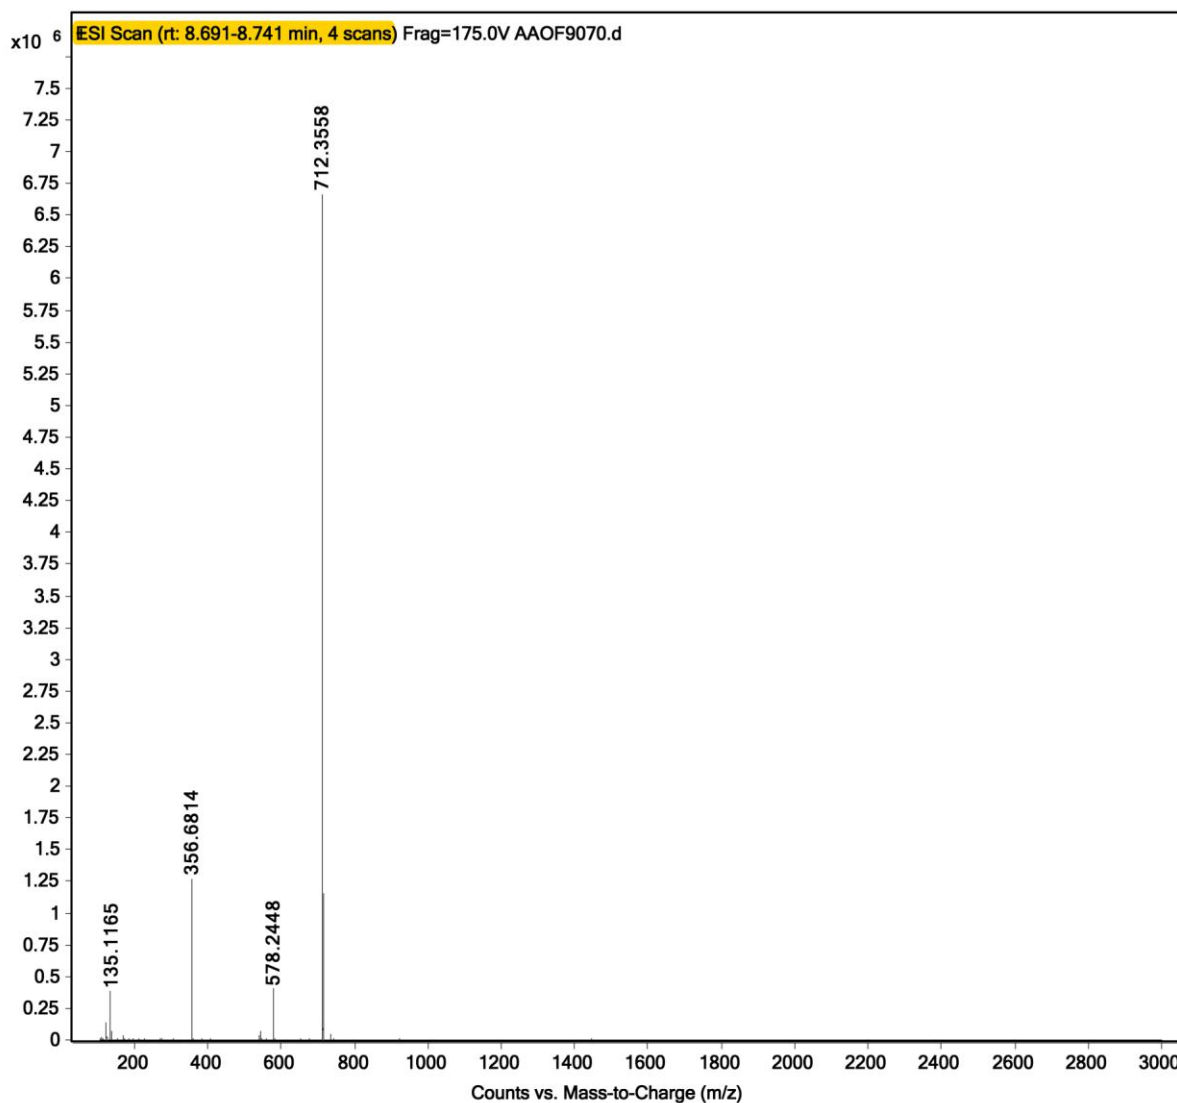

**Figure S14.** The ESI mass spectrum of the separated HPLC peak region 8.691–8.741 min (see Figure 15A) with the ammonium monocation ionization species of compound **3**. The ESI-MS fragment peaks (relative intensity of the 100% base peak) were  $m/z$  712.3558 (100%), 356.6814 (19.1%), 578.2448 (6.3%), and 135.1165 (5.8%).

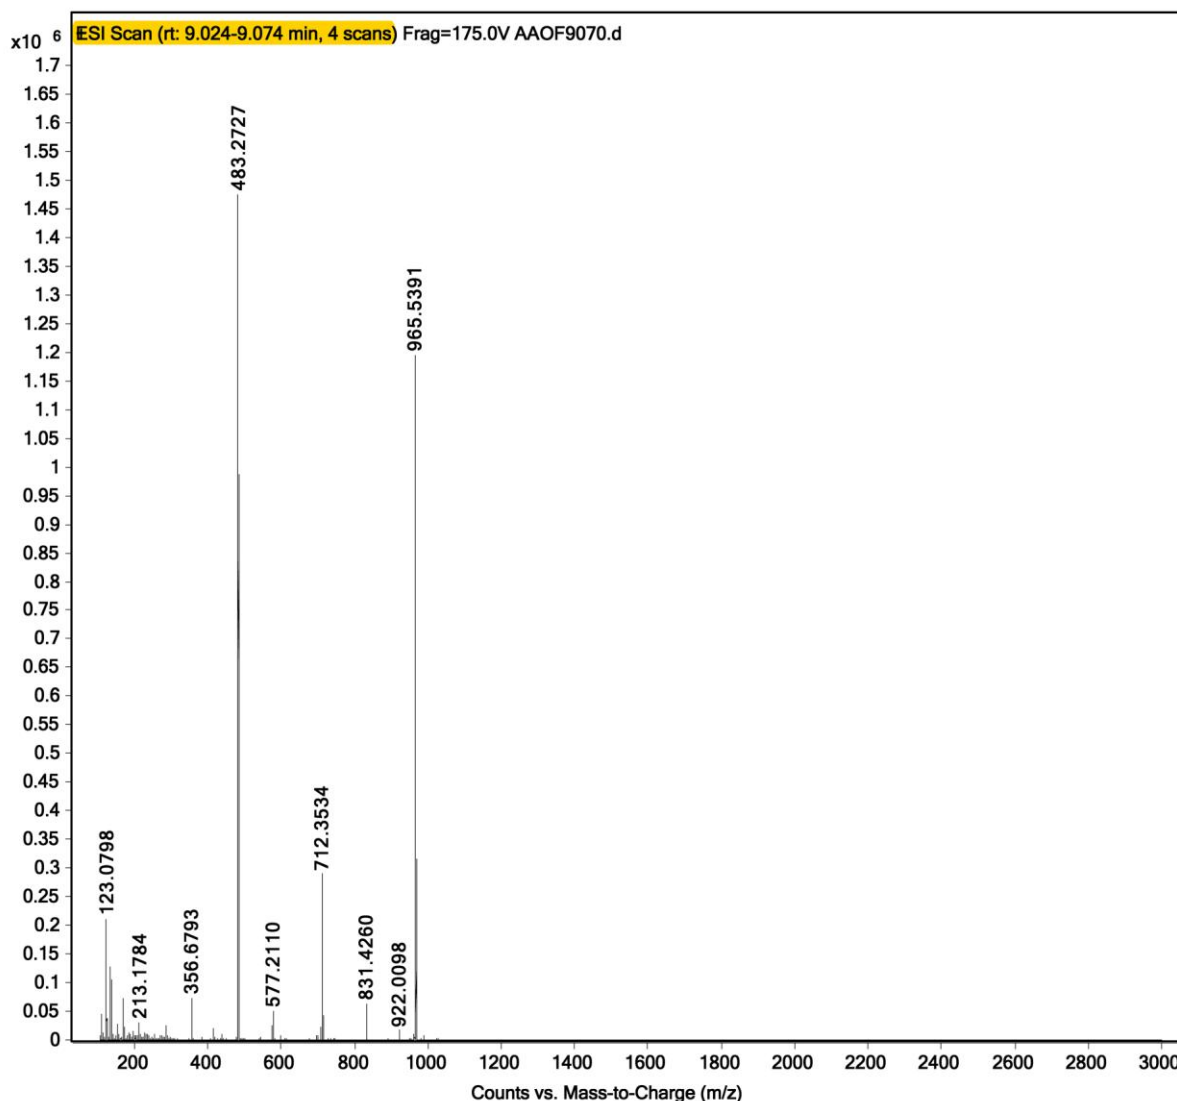

**Figure S15.** The ESI mass spectrum of the separated HPLC peak region 9.024–9.074 min (see Figure 15A) with the ylide dication ionization species of compound **3**. The ESI–MS fragment peaks (relative intensity of the 100% base peak) were  $m/z$  483.2727 (100%), 965.5391 (80.9%), 712.3534 (19.5%), 123.0798 (14.1%), 356.6793 (5.0%), 831.4260 (4.3%), 577.2110 (3.4%), and 213.1784 (2.3%). The  $m/z$  922.0098 is an internal control substance (reference cation) added to the analysis for auto-calibration of the mass spectrometer.

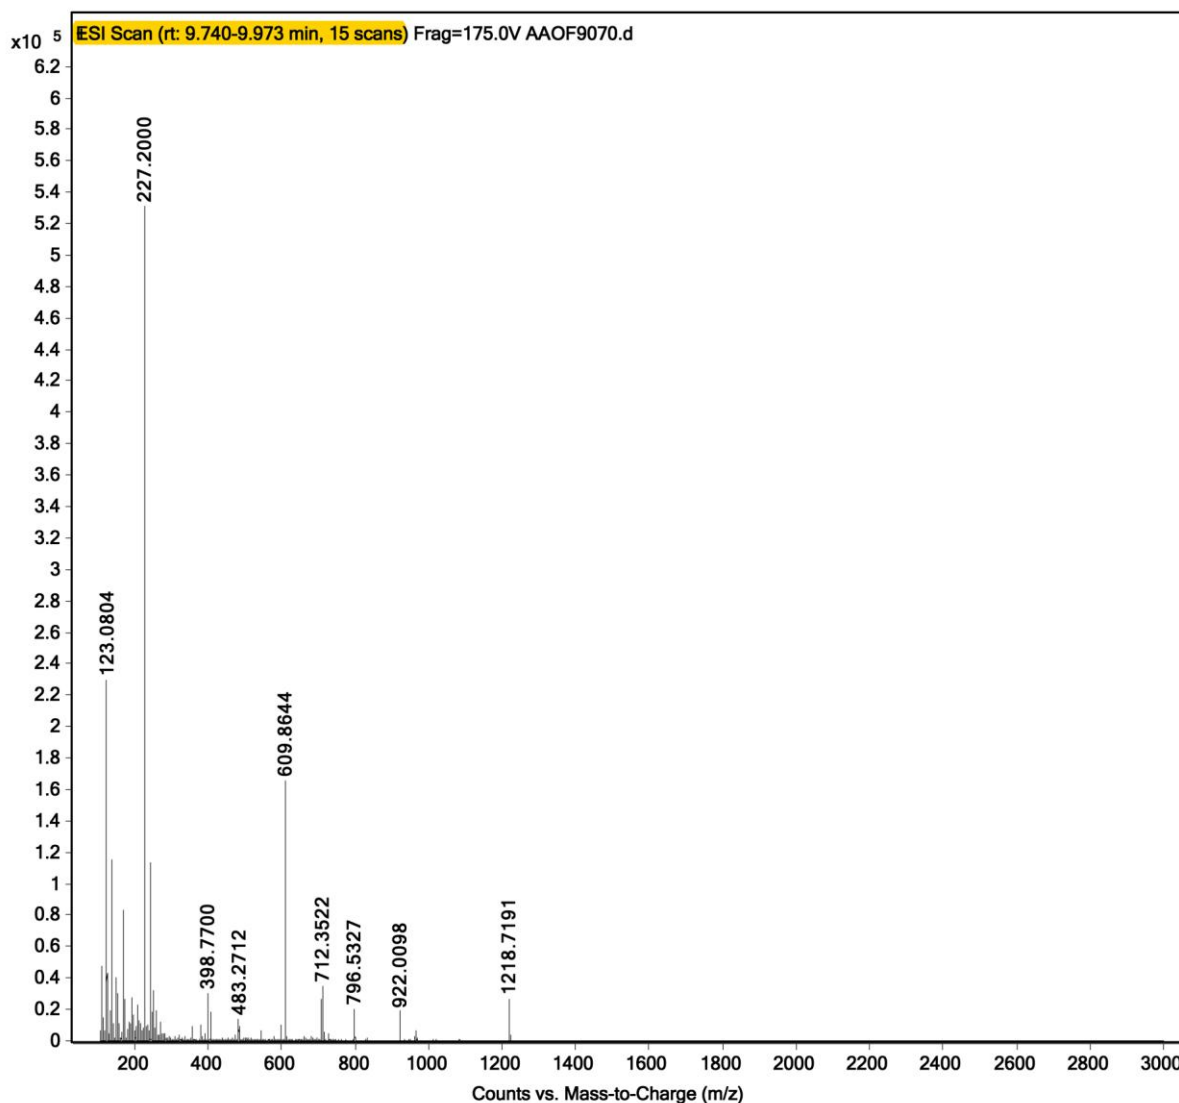

**Figure S16.** The ESI mass spectrum of the separated HPLC peak region 9.740–9.973 min (see Figure 15A) with the ylide monocation ionization species of compound **3**. The ESI–MS fragment peaks (relative intensity of the 100% base peak) were  $m/z$  227.2000 (100%), 123.0804 (47.2%), 609.8644 (31.0%), 712.3522 (6.6%), 398.7700 (5.8%), 1218.7191 (5.0%), 796.5327 (4.0%), and 483.2712 (2.5%). The  $m/z$  922.0098 is an internal control substance (reference cation) added to the analysis for auto-calibration of the mass spectrometer.

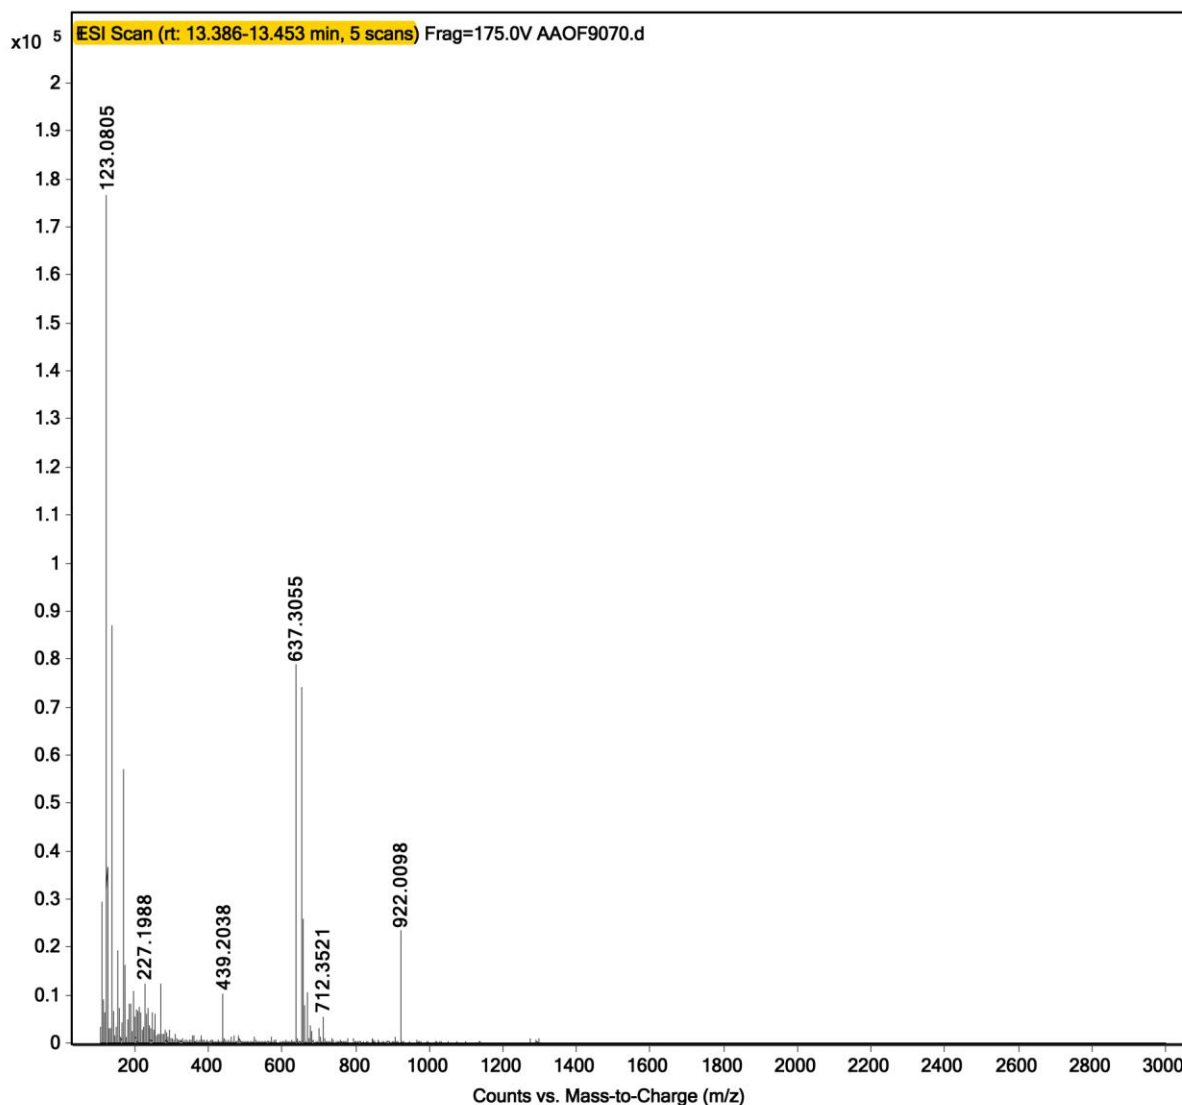

**Figure S17.** The ESI mass spectrum of the separated HPLC peak region 13.386–13.453 min (see Figure 15A) with the neutral ylide ionization species of compound **3**. The ESI–MS fragment peaks (relative intensity of the 100% base peak) were  $m/z$  123.0805 (100%), 637.3055 (45.6%), 227.1988 (7.1%), 439.2038 (5.8%), and 712.3521 (3.2%). The  $m/z$  922.0098 is an internal control substance (reference cation) added to the analysis for auto-calibration of the mass spectrometer.

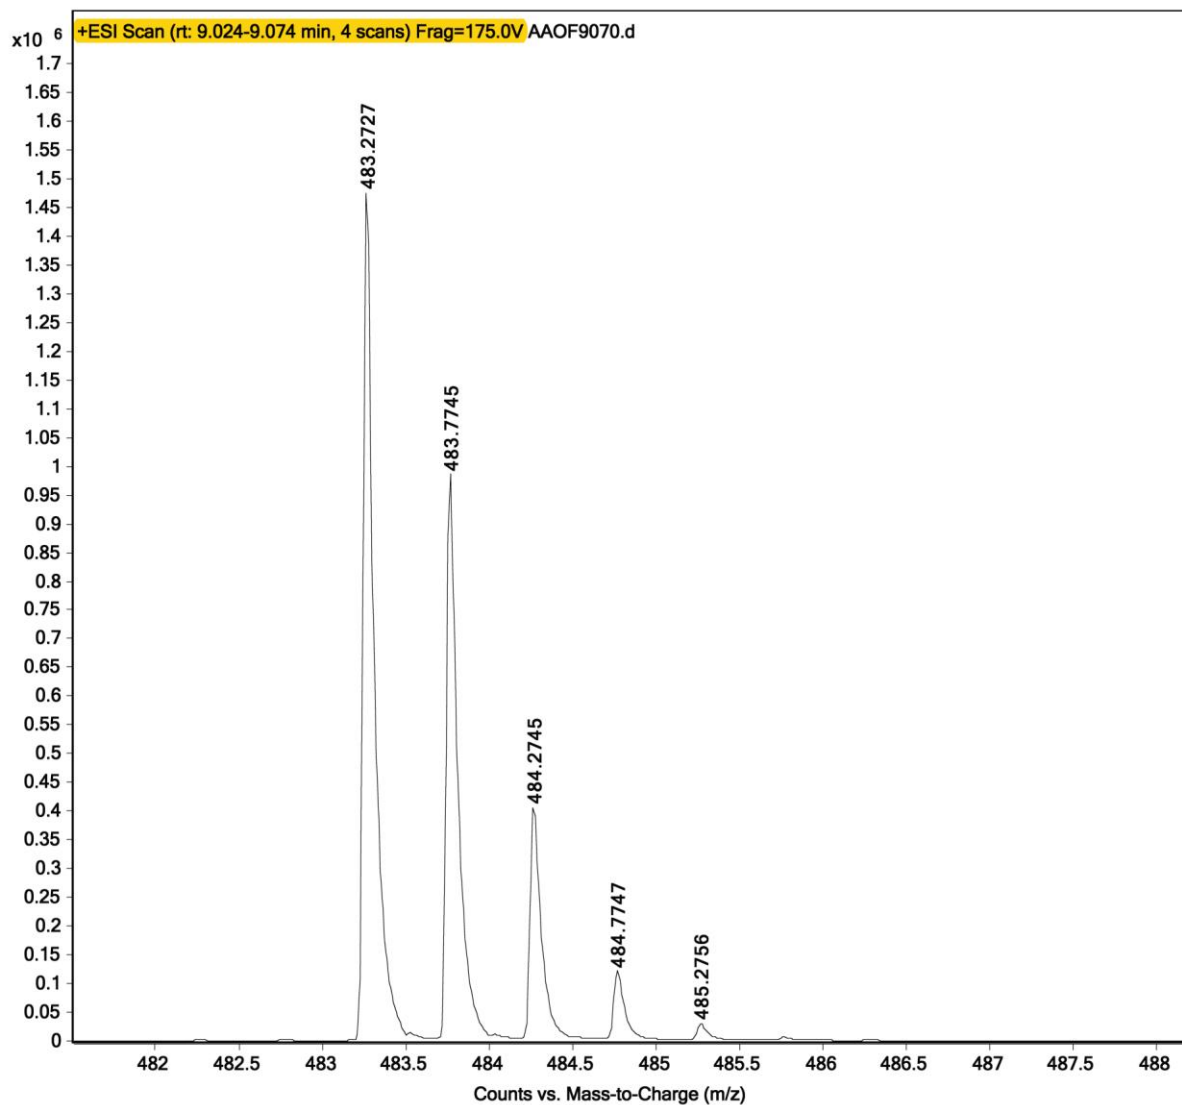

**Figure S18.** The enlargement of the ESI mass spectrum of the separated HPLC peak region 9.024–9.074 min (see Figure 15A) with the ylide dication ionization species of compound **3**, showing the 0.5 Da isotope peak spacing of the dication ( $\text{C}_{58}\text{H}_{74}\text{N}_6\text{O}_5\text{S}$ )<sup>2+</sup>  $m/z$  483.2727 Da.

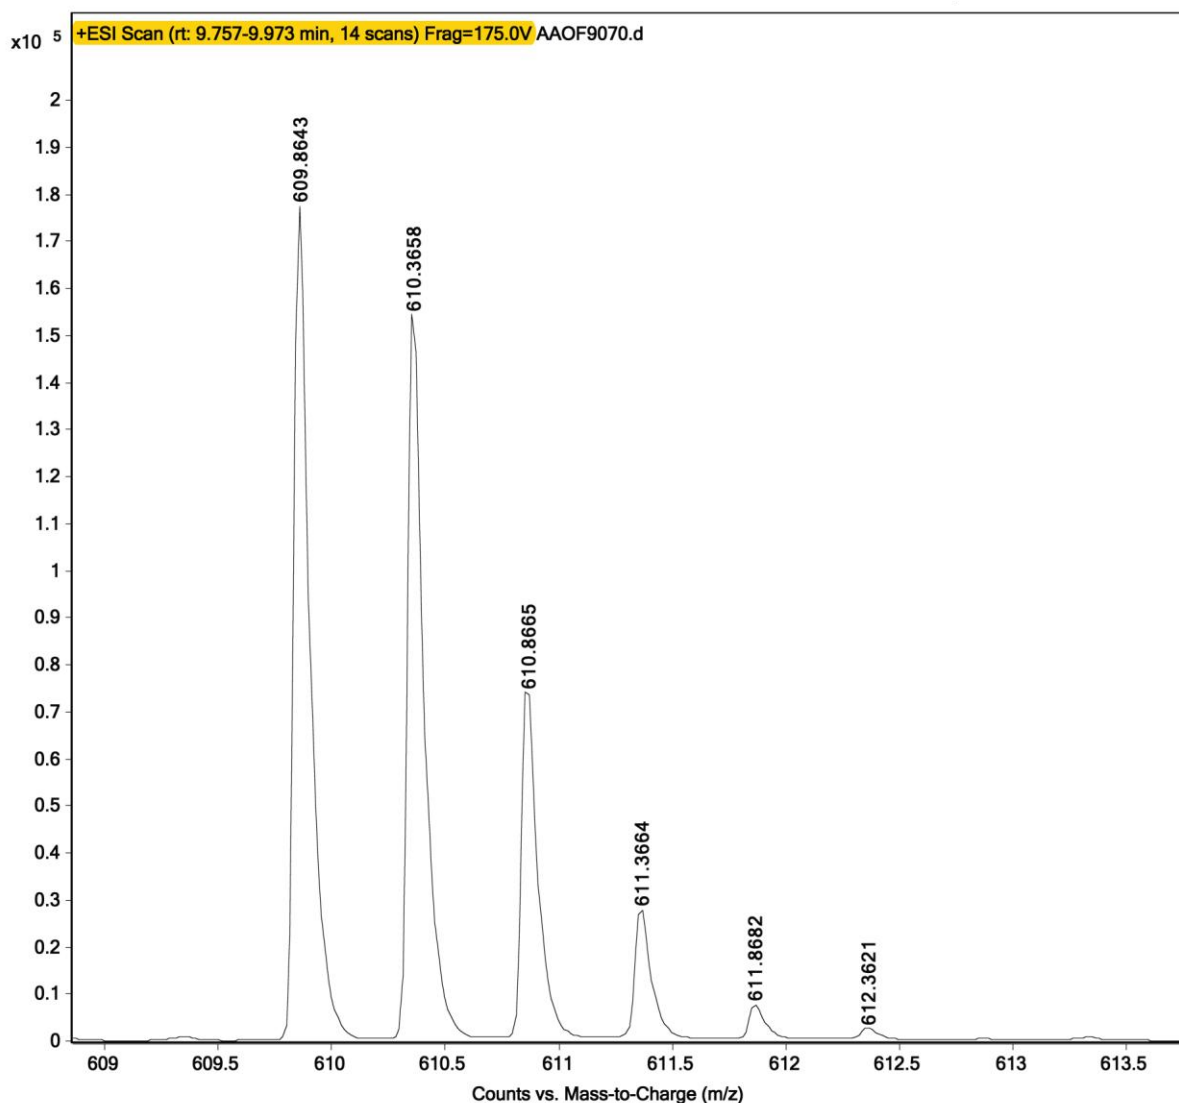

**Figure S19.** The enlargement of the ESI mass spectrum of the separated HPLC peak region 9.757–9.973 min (see Figure 15A) with the ylide monocation ionization species of compound **3**, showing the 0.5 Da isotope peak spacing of the dication ( $\text{C}_{74}\text{H}_{89}\text{N}_7\text{O}_7\text{S}$ )<sup>2+</sup>  $m/z$  609.8643 Da.



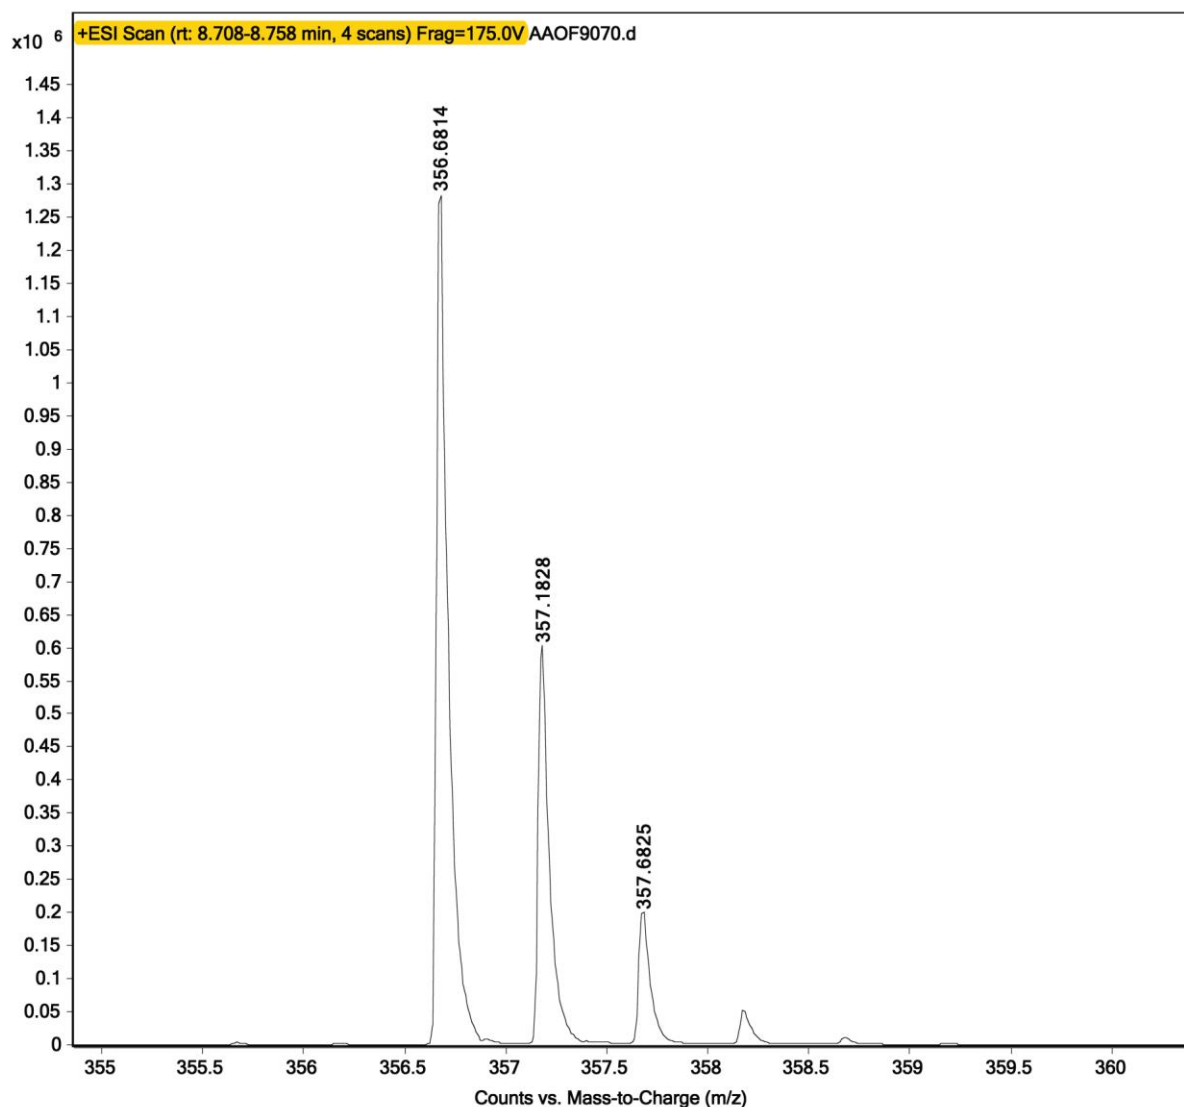

**Figure S20.** The enlargement of the ESI mass spectrum of the separated HPLC peak region 8.706–8.758 min (see Figure 15A) with the ammonium monocation ionization species of compound **3**, showing the 0.5 Da isotope peak spacing of the dication  $(C_{40}H_{49}N_4O_6S)^{2+}$   $m/z$  356.6814 Da.

**Table S1.** National Cancer Institute (NCI) Developmental Therapeutics Program (DTP) 60-cancer cell 5-dose testing of compound **1 (PT162)**, compound **2 (PT166)**, and compound **3 (PT167)** (with cellular p53 status).

| Cancer cell line                                                                               | Compound | GI50 (μM) | TGI (μM) | LC50 (μM) |
|------------------------------------------------------------------------------------------------|----------|-----------|----------|-----------|
| <b>Leukemia</b> (p53 status: *, termination; del, deletion; fs, frame shift; Lit., Literature) |          |           |          |           |
| <b>CCRF-CEM</b><br>mutant p53<br>R175H, R248Q                                                  | <b>1</b> | 1.46      | > 50     | > 50      |
|                                                                                                | <b>2</b> | 0.422     | > 100    | > 100     |
|                                                                                                | <b>3</b> | 0.904     | 2.47     | 14.9      |
| <b>HL-60 (TB)</b><br>mutant p53<br>p.M1_*394del                                                | <b>1</b> | 0.87      | 2.71     | > 50      |
|                                                                                                | <b>2</b> | 0.113     | 1.26     | > 100     |
|                                                                                                | <b>3</b> | 0.168     | 1.03     | 6.85      |
| <b>K-562</b><br>mutant p53<br>p.Q136fs*13                                                      | <b>1</b> | 1.46      | 36.2     | > 50      |
|                                                                                                | <b>2</b> | 0.362     | > 100    | > 100     |
|                                                                                                | <b>3</b> | —         | —        | —         |
| <b>MOLT-4</b><br>mutant p53<br>Lit. uncertain                                                  | <b>1</b> | 1.32      | 4.09     | > 50      |
|                                                                                                | <b>2</b> | 0.548     | > 100    | > 100     |
|                                                                                                | <b>3</b> | 0.562     | 1.93     | 13.3      |
| <b>RPMI-8226</b><br>mutant p53<br>E285K                                                        | <b>1</b> | 1.32      | 3.99     | > 50      |
|                                                                                                | <b>2</b> | 0.349     | 8.65     | > 100     |
|                                                                                                | <b>3</b> | 0.757     | 1.76     | > 33.3    |
| <b>SR</b><br>wild-type p53                                                                     | <b>1</b> | 1.49      | > 50     | > 50      |
|                                                                                                | <b>2</b> | 0.279     | > 100    | > 100     |
|                                                                                                | <b>3</b> | —         | —        | —         |
| <b>Non-small-cell lung cancer</b> (p53 status: *, termination; del, deletion; fs, frame shift) |          |           |          |           |
| <b>A549</b><br>wild-type p53                                                                   | <b>1</b> | 2.13      | 8.70     | 24.2      |
|                                                                                                | <b>2</b> | 3.23      | > 100    | > 100     |
|                                                                                                | <b>3</b> | 1.61      | 6.00     | 18.2      |
| <b>EKVX</b><br>mutant p53<br>splicing defect                                                   | <b>1</b> | —         | —        | —         |
|                                                                                                | <b>2</b> | #         | > 100    | > 100     |
|                                                                                                | <b>3</b> | 2.68      | 8.46     | 23.6      |
| <b>HOP-62</b><br>mutant p53<br>splicing defect                                                 | <b>1</b> | 2.66      | 10.1     | 29.7      |
|                                                                                                | <b>2</b> | 0.700     | > 100    | > 100     |
|                                                                                                | <b>3</b> | 2.14      | 7.43     | 20.2      |
| <b>HOP-92</b><br>mutant p53<br>R175L                                                           | <b>1</b> | 1.14      | 3.06     | 12.6      |
|                                                                                                | <b>2</b> | —         | —        | —         |
|                                                                                                | <b>3</b> | 0.897     | 4.08     | 15.1      |
| <b>NCI-H226</b><br>Lit. inconclusive                                                           | <b>1</b> | 2.76      | 10.8     | 31.2      |
|                                                                                                | <b>2</b> | 1.74      | > 100    | > 100     |
|                                                                                                | <b>3</b> | 1.96      | 9.97     | > 33.3    |
| <b>NCI-H23</b><br>mutant p53<br>M246I                                                          | <b>1</b> | 1.53      | 6.36     | 28.2      |
|                                                                                                | <b>2</b> | 0.438     | > 100    | > 100     |
|                                                                                                | <b>3</b> | 1.38      | 5.33     | 16.4      |
| <b>NCI-H322M</b><br>mutant p53<br>R248L                                                        | <b>1</b> | 1.26      | 5.10     | 16.0      |
|                                                                                                | <b>2</b> | 0.619     | > 100    | > 100     |
|                                                                                                | <b>3</b> | 2.57      | 7.03     | 16.3      |
| <b>NCI-H460</b><br>wild-type p53                                                               | <b>1</b> | 1.19      | 2.71     | 17.9      |
|                                                                                                | <b>2</b> | 0.429     | > 100    | > 100     |
|                                                                                                | <b>3</b> | 1.22      | 3.79     | 13.5      |

|                                                                                                    |          |       |       |       |
|----------------------------------------------------------------------------------------------------|----------|-------|-------|-------|
| <b>NCI-H522</b><br>mutant p53<br>p.P191fs*56                                                       | <b>1</b> | 0.731 | 1.55  | 3.30  |
|                                                                                                    | <b>2</b> | 0.550 | > 100 | > 100 |
|                                                                                                    | <b>3</b> | 0.699 | 1.88  | 8.33  |
| <b>Colon cancer</b> (p53 status: *, termination; del, deletion; fs, frame shift; Lit., Literature) |          |       |       |       |
| <b>COLO 205</b><br>mutant p53<br>Lit. uncertain                                                    | <b>1</b> | 1.09  | 3.13  | 24.8  |
|                                                                                                    | <b>2</b> | 0.280 | 0.622 | 9.13  |
|                                                                                                    | <b>3</b> | 0.683 | 1.52  | 3.61  |
| <b>HCC-2998</b><br>mutant p53<br>R213X                                                             | <b>1</b> | 1.22  | 5.31  | 22.6  |
|                                                                                                    | <b>2</b> | 0.272 | 0.674 | > 100 |
|                                                                                                    | <b>3</b> | 0.635 | 1.47  | 3.55  |
| <b>HCT-116</b><br>wild-type p53                                                                    | <b>1</b> | 0.728 | 2.01  | 6.47  |
|                                                                                                    | <b>2</b> | 0.377 | 10.6  | > 100 |
|                                                                                                    | <b>3</b> | 0.896 | 3.07  | 11.0  |
| <b>HCT-15</b><br>mutant p53<br>Lit. uncertain                                                      | <b>1</b> | 1.10  | 3.91  | 18.4  |
|                                                                                                    | <b>2</b> | 4.03  | > 100 | > 100 |
|                                                                                                    | <b>3</b> | 1.56  | 5.96  | 17.2  |
| <b>HT29</b><br>mutant p53<br>R273H                                                                 | <b>1</b> | 0.857 | 2.82  | 14.6  |
|                                                                                                    | <b>2</b> | 0.336 | > 100 | > 100 |
|                                                                                                    | <b>3</b> | 0.958 | 2.81  | 11.3  |
| <b>KM-12</b><br>mutant p53<br>Lit. uncertain                                                       | <b>1</b> | 1.65  | 6.75  | 20.6  |
|                                                                                                    | <b>2</b> | 0.255 | 0.801 | > 100 |
|                                                                                                    | <b>3</b> | 1.08  | 4.52  | 22.5  |
| <b>SW-620</b><br>mutant p53<br>R273H, P309S                                                        | <b>1</b> | 1.25  | 3.95  | 17.2  |
|                                                                                                    | <b>2</b> | 0.369 | > 100 | > 100 |
|                                                                                                    | <b>3</b> | 0.814 | 2.06  | 8.74  |
| <b>CNS cancer (brain tumor)</b> (p53 status: *, termination; del, deletion; fs, frame shift)       |          |       |       |       |
| <b>SF-268</b><br>mutant p53<br>R273H                                                               | <b>1</b> | 1.53  | 5.41  | 30.8  |
|                                                                                                    | <b>2</b> | 0.581 | > 100 | > 100 |
|                                                                                                    | <b>3</b> | 1.37  | 6.54  | 29.9  |
| <b>SF-295</b><br>mutant p53<br>R248Q                                                               | <b>1</b> | 3.05  | 10.4  | 28.2  |
|                                                                                                    | <b>2</b> | 0.549 | > 100 | > 100 |
|                                                                                                    | <b>3</b> | 1.53  | 5.92  | 15.4  |
| <b>SF-539</b><br>mutant p53<br>Lit. uncertain                                                      | <b>1</b> | 1.01  | 2.48  | 7.59  |
|                                                                                                    | <b>2</b> | 0.418 | 20.5  | > 100 |
|                                                                                                    | <b>3</b> | 1.14  | 4.30  | 13.8  |
| <b>SNB-19</b><br>mutant p53<br>R273H                                                               | <b>1</b> | 1.92  | 7.27  | 19.9  |
|                                                                                                    | <b>2</b> | 0.686 | > 100 | > 100 |
|                                                                                                    | <b>3</b> | 1.65  | 6.20  | 19.5  |
| <b>SNB-75</b><br>mutant p53<br>E258K                                                               | <b>1</b> | 2.34  | 9.73  | 27.9  |
|                                                                                                    | <b>2</b> | 0.441 | > 100 | > 100 |
|                                                                                                    | <b>3</b> | 1.40  | 6.68  | 20.1  |
| <b>U251</b><br>mutant p53<br>R273H                                                                 | <b>1</b> | 1.12  | 2.69  | 8.79  |
|                                                                                                    | <b>2</b> | 0.479 | > 100 | > 100 |
|                                                                                                    | <b>3</b> | —     | —     | —     |
| <b>Melanoma</b> (p53 status: *, termination; del, deletion; fs, frame shift; Lit., Literature)     |          |       |       |       |
| <b>LOX IMVI</b><br>wild-type p53                                                                   | <b>1</b> | 0.505 | 1.27  | 3.18  |
|                                                                                                    | <b>2</b> | 0.710 | > 100 | > 100 |
|                                                                                                    | <b>3</b> | 0.873 | 2.86  | 14.3  |

|                                                                                                      |          |       |       |       |
|------------------------------------------------------------------------------------------------------|----------|-------|-------|-------|
| <b>MALME-3M</b><br>wild-type p53                                                                     | <b>1</b> | 0.839 | 1.86  | 4.12  |
|                                                                                                      | <b>2</b> | 0.394 | > 100 | > 100 |
|                                                                                                      | <b>3</b> | 0.830 | 3.04  | 14.4  |
| <b>M14</b><br>mutant p53<br>G266E                                                                    | <b>1</b> | 0.803 | 2.08  | 6.82  |
|                                                                                                      | <b>2</b> | 0.284 | 0.735 | > 100 |
|                                                                                                      | <b>3</b> | 0.822 | 2.26  | 9.06  |
| <b>MDA-MB-435</b><br>mutant p53<br>G266E                                                             | <b>1</b> | 0.825 | 2.11  | 6.50  |
|                                                                                                      | <b>2</b> | 0.233 | 0.838 | > 100 |
|                                                                                                      | <b>3</b> | 0.779 | 3.50  | 12.4  |
| <b>SK-MEL-2</b><br>mutant p53<br>G245S                                                               | <b>1</b> | 1.06  | 3.20  | 15.6  |
|                                                                                                      | <b>2</b> | > 100 | > 100 | > 100 |
|                                                                                                      | <b>3</b> | 0.861 | 2.76  | 12.4  |
| <b>SK-MEL-28</b><br>mutant p53<br>L145R                                                              | <b>1</b> | 1.66  | 7.91  | 21.9  |
|                                                                                                      | <b>2</b> | —     | > 100 | > 100 |
|                                                                                                      | <b>3</b> | 1.02  | 4.07  | 13.6  |
| <b>SK-MEL-5</b><br>wild-type p53                                                                     | <b>1</b> | 1.52  | 6.28  | 18.6  |
|                                                                                                      | <b>2</b> | 0.373 | 4.71  | > 100 |
|                                                                                                      | <b>3</b> | 0.810 | 2.25  | 8.65  |
| <b>UACC-257</b><br>wild-type p53                                                                     | <b>1</b> | 3.08  | 10.8  | 29.4  |
|                                                                                                      | <b>2</b> | 0.646 | > 100 | > 100 |
|                                                                                                      | <b>3</b> | 4.51  | 10.3  | 23.6  |
| <b>UACC-62</b><br>wild-type p53                                                                      | <b>1</b> | 1.16  | 3.68  | 14.2  |
|                                                                                                      | <b>2</b> | 0.625 | > 100 | > 100 |
|                                                                                                      | <b>3</b> | 1.61  | 6.38  | 18.0  |
| <b>Ovarian cancer</b> (p53 status: *, termination; del, deletion; fs, frame shift; Lit., Literature) |          |       |       |       |
| <b>IGROV1</b><br>mutant p53<br>Lit. uncertain                                                        | <b>1</b> | 0.886 | 2.34  | 8.65  |
|                                                                                                      | <b>2</b> | 1.18  | > 100 | > 100 |
|                                                                                                      | <b>3</b> | 1.45  | 5.95  | 20.9  |
| <b>OVCAR-3</b><br>mutant p53<br>R248Q                                                                | <b>1</b> | 1.04  | 2.82  | 9.97  |
|                                                                                                      | <b>2</b> | 0.217 | 0.459 | —     |
|                                                                                                      | <b>3</b> | 1.66  | 6.53  | 18.5  |
| <b>OVCAR-4</b><br>mutant p53<br>Lit. uncertain                                                       | <b>1</b> | 1.16  | 5.45  | 18.4  |
|                                                                                                      | <b>2</b> | 0.507 | > 100 | > 100 |
|                                                                                                      | <b>3</b> | 2.17  | 8.94  | 30.0  |
| <b>OVCAR-5</b><br>Lit. inconclusive                                                                  | <b>1</b> | 0.977 | 2.76  | 10.8  |
|                                                                                                      | <b>2</b> | 9.67  | > 100 | > 100 |
|                                                                                                      | <b>3</b> | 1.17  | 5.03  | 14.2  |
| <b>OVCAR-8</b><br>mutant p53<br>splicing defect                                                      | <b>1</b> | 2.07  | 8.48  | 35.3  |
|                                                                                                      | <b>2</b> | 0.970 | > 100 | > 100 |
|                                                                                                      | <b>3</b> | 2.03  | 7.49  | 24.3  |
| <b>NCI/ADR-RES</b><br>mutant p53<br>splicing defect                                                  | <b>1</b> | 1.44  | 4.55  | > 50  |
|                                                                                                      | <b>2</b> | 25.3  | > 100 | > 100 |
|                                                                                                      | <b>3</b> | 5.43  | 12.5  | 28.6  |
| <b>SK-OV-3</b><br>no p53 protein<br>expressed                                                        | <b>1</b> | 5.11  | 11.4  | 25.5  |
|                                                                                                      | <b>2</b> | 1.39  | > 100 | > 100 |
|                                                                                                      | <b>3</b> | 3.00  | 7.51  | 17.6  |

| <b>Renal cancer</b> (p53 status: *, termination; del, deletion; fs, frame shift; Lit., Literature)       |          |       |       |        |
|----------------------------------------------------------------------------------------------------------|----------|-------|-------|--------|
| <b>786-0</b><br>mutant p53<br>Lit. uncertain                                                             | <b>1</b> | 0.848 | 1.85  | 4.05   |
|                                                                                                          | <b>2</b> | 0.818 | > 100 | > 100  |
|                                                                                                          | <b>3</b> | 1.30  | 5.28  | 17.6   |
| <b>A498</b><br>wild-type p53                                                                             | <b>1</b> | 1.19  | 7.05  | 21.2   |
|                                                                                                          | <b>2</b> | 2.09  | > 100 | > 100  |
|                                                                                                          | <b>3</b> | 1.07  | 3.28  | 12.4   |
| <b>ACHN</b><br>wild-type p53                                                                             | <b>1</b> | 0.874 | 2.14  | 5.55   |
|                                                                                                          | <b>2</b> | 8.50  | > 100 | > 100  |
|                                                                                                          | <b>3</b> | 3.68  | 7.99  | 17.3   |
| <b>CAKI-1</b><br>wild-type p53                                                                           | <b>1</b> | 1.28  | 4.70  | 15.4   |
|                                                                                                          | <b>2</b> | 7.12  | > 100 | > 100  |
|                                                                                                          | <b>3</b> | 3.20  | 7.37  | 16.5   |
| <b>RXF 393</b><br>mutant p53<br>R175H                                                                    | <b>1</b> | 0.811 | 1.56  | 3.02   |
|                                                                                                          | <b>2</b> | 0.298 | 0.747 | > 100  |
|                                                                                                          | <b>3</b> | 1.70  | 6.65  | 20.9   |
| <b>SN12C</b><br>mutant p53<br>E336X                                                                      | <b>1</b> | 1.41  | 4.43  | 15.8   |
|                                                                                                          | <b>2</b> | 0.828 | > 100 | > 100  |
|                                                                                                          | <b>3</b> | 2.23  | 6.90  | 17.4   |
| <b>TK-10</b><br>mutant p53<br>L264R                                                                      | <b>1</b> | 1.85  | 7.17  | 21.5   |
|                                                                                                          | <b>2</b> | 6.77  | > 100 | > 100  |
|                                                                                                          | <b>3</b> | 3.66  | 8.35  | 19.0   |
| <b>UO-31</b><br>wild-type p53                                                                            | <b>1</b> | 0.817 | 1.96  | 4.73   |
|                                                                                                          | <b>2</b> | > 100 | > 100 | > 100  |
|                                                                                                          | <b>3</b> | 2.16  | 7.20  | 18.3   |
| <b>Prostate cancer</b> (p53 status: *, termination; del, deletion; fs, frame shift; –, null p53 protein) |          |       |       |        |
| <b>PC-3</b><br>mutant p53 –<br>p.K139fs*31                                                               | <b>1</b> | 1.40  | 5.17  | 21.4   |
|                                                                                                          | <b>2</b> | 0.255 | > 100 | > 100  |
|                                                                                                          | <b>3</b> | 1.45  | 5.64  | 17.1   |
| <b>DU-145</b><br>mutant p53<br>P223L, V274F                                                              | <b>1</b> | 1.47  | 4.61  | 15.2   |
|                                                                                                          | <b>2</b> | 0.341 | 1.44  | > 100  |
|                                                                                                          | <b>3</b> | 2.46  | 7.10  | 17.3   |
| <b>Breast cancer</b> (p53 status: *, termination; del, deletion; fs, frame shift)                        |          |       |       |        |
| <b>MCF7</b><br>wild-type p53                                                                             | <b>1</b> | 1.07  | 6.19  | 45.8   |
|                                                                                                          | <b>2</b> | 0.415 | > 100 | > 100  |
|                                                                                                          | <b>3</b> | 0.862 | 3.44  | > 33.3 |
| <b>MDA-MB-231</b><br>mutant p53<br>R280K                                                                 | <b>1</b> | 2.09  | 7.41  | 22.7   |
|                                                                                                          | <b>2</b> | 0.359 | 1.88  | > 100  |
|                                                                                                          | <b>3</b> | 0.994 | 2.99  | 12.4   |
| <b>HS 578T</b><br>mutant p53<br>V157F                                                                    | <b>1</b> | 1.92  | 11.8  | > 50   |
|                                                                                                          | <b>2</b> | > 100 | > 100 | > 100  |
|                                                                                                          | <b>3</b> | 1.22  | 6.76  | > 33.3 |
| <b>BT-549</b><br>mutant p53<br>R249S                                                                     | <b>1</b> | 1.02  | 2.77  | 10.2   |
|                                                                                                          | <b>2</b> | 0.294 | 0.924 | > 100  |
|                                                                                                          | <b>3</b> | 1.55  | 5.89  | 16.5   |
| <b>T-47D</b><br>mutant p53<br>L194F                                                                      | <b>1</b> | 1.34  | 6.72  | 38.0   |
|                                                                                                          | <b>2</b> | > 100 | > 100 | > 100  |
|                                                                                                          | <b>3</b> | 1.83  | 9.40  | > 33.3 |

|                                          |          |                  |                 |                  |
|------------------------------------------|----------|------------------|-----------------|------------------|
| <b>MDA-MB-468</b><br>mutant p53<br>R273H | <b>1</b> | 0.797            | 1.68            | 3.55             |
|                                          | <b>2</b> | 0.158            | 0.464           | > 100            |
|                                          | <b>3</b> | 0.657            | 1.75            | 10.7             |
| <b>Mean of Inhibition Data (MID)</b>     |          | <b>GI50 (μM)</b> | <b>TGI (μM)</b> | <b>LC50 (μM)</b> |
| 10 <sup>MID</sup>                        | <b>1</b> | 1.288            | 4.677           | 16.596           |
| 10 <sup>MID</sup>                        | <b>2</b> | 0.933            | 32.359          | 95.499           |
| 10 <sup>MID</sup>                        | <b>3</b> | 1.349            | 4.571           | 15.849           |

#, The **GI50** value could not being calculated due to positive growth.

—, Not tested, because cancer cell line not available at NCI test facility.

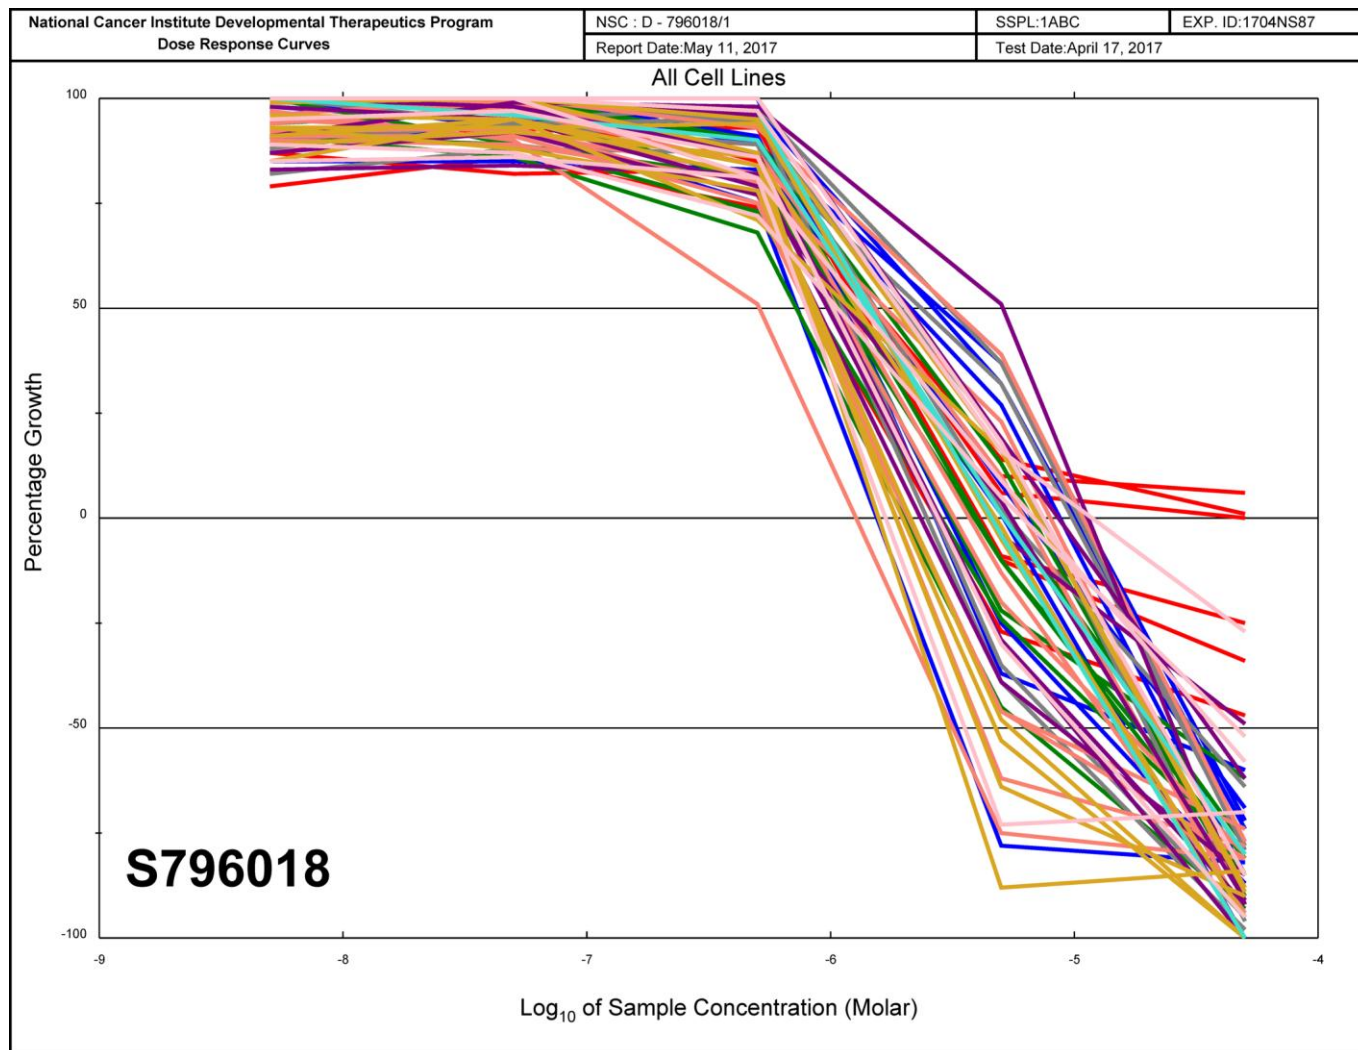

**Figure S21.** Graphic allover presentation of the antineoplastic activity in the National Cancer Institute (NCI) Developmental Therapeutics Program (DTP) 60-cancer cell 5-dose testing exhibited by the pure drug compound **1 (PT162, NSC 796018)** with **All Cell Lines** in one graphic.

| National Cancer Institute Developmental Therapeutics Program |           |       |                                       |       |       |       |        |      |                |      |      |      |               |           |           |  |
|--------------------------------------------------------------|-----------|-------|---------------------------------------|-------|-------|-------|--------|------|----------------|------|------|------|---------------|-----------|-----------|--|
| In-Vitro Testing Results                                     |           |       |                                       |       |       |       |        |      |                |      |      |      |               |           |           |  |
| NSC : D - 796018 / 1                                         |           |       | Experiment ID : 1704NS87              |       |       |       |        |      | Test Type : 08 |      |      |      | Units : Molar |           |           |  |
| Report Date : May 11, 2017                                   |           |       | Test Date : April 17, 2017            |       |       |       |        |      | QNS :          |      |      |      | MC :          |           |           |  |
| COMI : PT162                                                 |           |       | Stain Reagent : SRB Dual-Pass Related |       |       |       |        |      | SSPL : 1ABC    |      |      |      |               |           |           |  |
| Log10 Concentration                                          |           |       |                                       |       |       |       |        |      |                |      |      |      |               |           |           |  |
| Panel/Cell Line                                              | Time Zero | Ctrl  | -8.3                                  | -7.3  | -6.3  | -5.3  | -4.3   | -8.3 | -7.3           | -6.3 | -5.3 | -4.3 | GI50          | TGI       | LC50      |  |
| Leukemia                                                     |           |       |                                       |       |       |       |        |      |                |      |      |      |               |           |           |  |
| CCRF-CEM                                                     | 0.434     | 1.625 | 1.618                                 | 1.661 | 1.441 | 0.557 | 0.503  | 99   | 103            | 85   | 10   | 6    | 1.46E-6       | > 5.00E-5 | > 5.00E-5 |  |
| HL-60(TB)                                                    | 0.750     | 2.047 | 1.769                                 | 1.864 | 1.715 | 0.548 | 0.396  | 79   | 86             | 74   | -27  | -47  | 8.70E-7       | 2.71E-6   | > 5.00E-5 |  |
| K-562                                                        | 0.269     | 1.764 | 1.761                                 | 1.653 | 1.593 | 0.354 | 0.267  | 100  | 93             | 89   | 6    |      | 1.46E-6       | 3.62E-5   | > 5.00E-5 |  |
| MOLT-4                                                       | 0.735     | 2.452 | 2.235                                 | 2.329 | 2.332 | 0.670 | 0.553  | 87   | 97             | 93   | -9   | -25  | 1.32E-6       | 4.00E-6   | > 5.00E-5 |  |
| RPMLI-8226                                                   | 0.587     | 2.220 | 2.252                                 | 2.299 | 2.117 | 0.528 | 0.386  | 102  | 105            | 94   | -10  | -34  | 1.32E-6       | 3.99E-6   | > 5.00E-5 |  |
| SR                                                           | 0.441     | 1.725 | 1.564                                 | 1.491 | 1.504 | 0.615 | 0.457  | 87   | 82             | 83   | 14   | 1    | 1.49E-6       | > 5.00E-5 | > 5.00E-5 |  |
| Non-Small Cell Lung Cancer                                   |           |       |                                       |       |       |       |        |      |                |      |      |      |               |           |           |  |
| A549/ATCC                                                    | 0.361     | 1.704 | 1.693                                 | 1.730 | 1.557 | 0.724 | 0.053  | 99   | 102            | 89   | 27   | -85  | 2.13E-6       | 8.70E-6   | 2.42E-5   |  |
| HOP-62                                                       | 0.745     | 2.044 | 1.904                                 | 1.969 | 2.004 | 1.165 | 0.193  | 89   | 94             | 97   | 32   | -74  | 2.66E-6       | 1.01E-5   | 2.97E-5   |  |
| HOP-92                                                       | 1.114     | 1.649 | 1.626                                 | 1.647 | 1.603 | 0.837 | 0.142  | 96   | 100            | 91   | -25  | -87  | 1.14E-6       | 3.06E-6   | 1.26E-5   |  |
| NCI-H226                                                     | 0.841     | 1.823 | 1.875                                 | 1.867 | 1.711 | 1.200 | 0.233  | 105  | 105            | 89   | 37   | -72  | 2.76E-6       | 1.08E-5   | 3.12E-5   |  |
| NCI-H23                                                      | 0.511     | 1.825 | 1.804                                 | 1.748 | 1.686 | 0.618 | 0.157  | 98   | 94             | 89   | 8    | -69  | 1.53E-6       | 6.36E-6   | 2.82E-5   |  |
| NCI-H322M                                                    | 0.874     | 2.125 | 1.936                                 | 1.933 | 1.909 | 0.885 | -0.004 | 85   | 85             | 83   | 1    | -100 | 1.26E-6       | 5.10E-6   | 1.60E-5   |  |
| NCI-H460                                                     | 0.221     | 2.164 | 2.313                                 | 2.308 | 2.213 | 0.139 | 0.088  | 108  | 107            | 103  | -37  | -60  | 1.19E-6       | 2.71E-6   | 1.79E-5   |  |
| NCI-H522                                                     | 0.892     | 2.118 | 2.215                                 | 2.030 | 1.815 | 0.200 | 0.162  | 108  | 93             | 75   | -78  | -82  | 7.31E-7       | 1.55E-6   | 3.30E-6   |  |
| Colon Cancer                                                 |           |       |                                       |       |       |       |        |      |                |      |      |      |               |           |           |  |
| COLO 205                                                     | 0.508     | 1.801 | 1.785                                 | 1.795 | 1.634 | 0.396 | 0.192  | 99   | 99             | 87   | -22  | -62  | 1.09E-6       | 3.13E-6   | 2.48E-5   |  |
| HCC-2998                                                     | 0.694     | 2.339 | 2.238                                 | 2.288 | 2.016 | 0.729 | 0.156  | 94   | 97             | 80   | 2    | -78  | 1.22E-6       | 5.31E-6   | 2.26E-5   |  |
| HCT-116                                                      | 0.195     | 1.586 | 1.457                                 | 1.393 | 1.147 | 0.108 | 0.014  | 91   | 86             | 68   | -45  | -93  | 7.28E-7       | 2.01E-6   | 6.47E-6   |  |
| HCT-15                                                       | 0.192     | 1.407 | 1.294                                 | 1.276 | 1.176 | 0.174 | 0.037  | 91   | 89             | 81   | -10  | -81  | 1.10E-6       | 3.91E-6   | 1.84E-5   |  |
| HT29                                                         | 0.230     | 1.418 | 1.436                                 | 1.288 | 1.093 | 0.175 | 0.047  | 102  | 89             | 73   | -24  | -80  | 8.57E-7       | 2.82E-6   | 1.46E-5   |  |
| KM12                                                         | 0.508     | 2.477 | 2.465                                 | 2.492 | 2.271 | 0.774 | 0.052  | 99   | 101            | 90   | 13   | -90  | 1.65E-6       | 6.75E-6   | 2.06E-5   |  |
| SW-620                                                       | 0.265     | 1.779 | 1.766                                 | 1.770 | 1.625 | 0.238 | 0.041  | 99   | 99             | 90   | -10  | -85  | 1.25E-6       | 3.95E-6   | 1.72E-5   |  |
| CNS Cancer                                                   |           |       |                                       |       |       |       |        |      |                |      |      |      |               |           |           |  |
| SF-268                                                       | 0.537     | 1.916 | 1.923                                 | 1.840 | 1.847 | 0.568 | 0.194  | 101  | 94             | 95   | 2    | -64  | 1.53E-6       | 5.41E-6   | 3.08E-5   |  |
| SF-295                                                       | 0.604     | 2.280 | 2.086                                 | 2.200 | 2.241 | 1.223 | 0.129  | 88   | 95             | 98   | 37   | -79  | 3.05E-6       | 1.04E-5   | 2.82E-5   |  |
| SF-539                                                       | 1.012     | 2.658 | 2.490                                 | 2.556 | 2.485 | 0.614 | 0.018  | 90   | 94             | 89   | -39  | -98  | 1.01E-6       | 2.48E-6   | 7.59E-6   |  |
| SNB-19                                                       | 0.445     | 1.952 | 1.950                                 | 1.949 | 1.867 | 0.726 | 0.019  | 100  | 100            | 94   | 19   | -96  | 1.92E-6       | 7.27E-6   | 1.99E-5   |  |
| SNB-75                                                       | 0.886     | 1.781 | 1.618                                 | 1.671 | 1.698 | 1.169 | 0.198  | 82   | 88             | 87   | 32   | -78  | 2.34E-6       | 9.73E-6   | 2.79E-5   |  |
| U251                                                         | 0.334     | 1.564 | 1.609                                 | 1.612 | 1.515 | 0.216 | 0.016  | 104  | 104            | 96   | -35  | -95  | 1.12E-6       | 2.69E-6   | 8.79E-6   |  |
| Melanoma                                                     |           |       |                                       |       |       |       |        |      |                |      |      |      |               |           |           |  |
| LOX IMVI                                                     | 0.333     | 2.352 | 2.284                                 | 2.153 | 1.354 | 0.085 | 0.063  | 97   | 90             | 51   | -75  | -81  | 5.05E-7       | 1.27E-6   | 3.18E-6   |  |
| MALME-3M                                                     | 0.572     | 1.296 | 1.261                                 | 1.241 | 1.169 | 0.217 | 0.126  | 95   | 92             | 82   | -62  | -78  | 8.39E-7       | 1.86E-6   | 4.12E-6   |  |
| M14                                                          | 0.420     | 1.538 | 1.434                                 | 1.433 | 1.258 | 0.226 | 0.108  | 91   | 91             | 75   | -46  | -74  | 8.03E-7       | 2.08E-6   | 6.82E-6   |  |
| MDA-MB-435                                                   | 0.592     | 2.489 | 2.328                                 | 2.357 | 2.047 | 0.320 | 0.114  | 92   | 93             | 77   | -46  | -81  | 8.25E-7       | 2.11E-6   | 6.50E-6   |  |
| SK-MEL-2                                                     | 1.031     | 2.002 | 2.045                                 | 1.977 | 1.848 | 0.822 | 0.202  | 104  | 97             | 84   | -20  | -80  | 1.06E-6       | 3.20E-6   | 1.56E-5   |  |
| SK-MEL-28                                                    | 0.753     | 2.281 | 2.125                                 | 2.119 | 1.974 | 1.098 | 0.071  | 90   | 89             | 80   | 23   | -91  | 1.66E-6       | 7.91E-6   | 2.19E-5   |  |
| SK-MEL-5                                                     | 0.632     | 2.957 | 2.993                                 | 2.933 | 2.653 | 0.876 | 0.030  | 102  | 99             | 87   | 10   | -95  | 1.52E-6       | 6.28E-6   | 1.86E-5   |  |
| UACC-257                                                     | 1.062     | 2.071 | 2.030                                 | 2.114 | 1.997 | 1.452 | 0.250  | 96   | 104            | 93   | 39   | -77  | 3.08E-6       | 1.08E-5   | 2.94E-5   |  |
| UACC-62                                                      | 0.631     | 2.480 | 2.374                                 | 2.437 | 2.232 | 0.548 | 0.037  | 94   | 98             | 87   | -13  | -94  | 1.16E-6       | 3.68E-6   | 1.42E-5   |  |
| Ovarian Cancer                                               |           |       |                                       |       |       |       |        |      |                |      |      |      |               |           |           |  |
| IGROV1                                                       | 0.375     | 1.766 | 1.742                                 | 1.690 | 1.480 | 0.229 | 0.055  | 98   | 95             | 79   | -39  | -85  | 8.86E-7       | 2.34E-6   | 8.65E-6   |  |
| OVCAR-3                                                      | 0.417     | 1.444 | 1.440                                 | 1.423 | 1.309 | 0.298 | 0.001  | 100  | 98             | 87   | -29  | -100 | 1.04E-6       | 2.82E-6   | 9.97E-6   |  |
| OVCAR-4                                                      | 0.826     | 1.589 | 1.578                                 | 1.616 | 1.489 | 0.857 | 0.073  | 87   | 92             | 77   | 4    | -91  | 1.16E-6       | 5.45E-6   | 1.84E-5   |  |
| OVCAR-5                                                      | 0.581     | 1.404 | 1.263                                 | 1.273 | 1.259 | 0.414 | 0.045  | 83   | 84             | 82   | -29  | -92  | 9.77E-7       | 2.76E-6   | 1.08E-5   |  |
| OVCAR-8                                                      | 0.581     | 2.270 | 2.357                                 | 2.368 | 2.279 | 0.894 | 0.220  | 105  | 106            | 101  | 19   | -62  | 2.07E-6       | 8.48E-6   | 3.53E-5   |  |
| NCI/ADR-RES                                                  | 0.487     | 1.643 | 1.650                                 | 1.641 | 1.596 | 0.467 | 0.251  | 101  | 100            | 96   | -4   | -49  | 1.44E-6       | 4.55E-6   | > 5.00E-5 |  |
| SK-OV-3                                                      | 0.894     | 1.876 | 1.787                                 | 1.867 | 1.854 | 1.399 | 0.071  | 91   | 99             | 98   | 51   | -92  | 5.11E-6       | 1.14E-5   | 2.55E-5   |  |
| Renal Cancer                                                 |           |       |                                       |       |       |       |        |      |                |      |      |      |               |           |           |  |
| 786-O                                                        | 0.403     | 1.759 | 1.632                                 | 1.687 | 1.540 | 0.147 | 0.041  | 91   | 95             | 84   | -64  | -90  | 8.48E-7       | 1.85E-6   | 4.05E-6   |  |
| A498                                                         | 1.422     | 2.245 | 2.125                                 | 2.205 | 2.005 | 1.551 | 0.159  | 85   | 95             | 71   | 16   | -89  | 1.19E-6       | 7.05E-6   | 2.12E-5   |  |
| ACHN                                                         | 0.379     | 1.642 | 1.589                                 | 1.581 | 1.405 | 0.199 | -0.002 | 96   | 95             | 81   | -48  | -100 | 8.74E-7       | 2.14E-6   | 5.55E-6   |  |
| CAKI-1                                                       | 0.767     | 2.753 | 2.532                                 | 2.597 | 2.481 | 0.749 | 0.004  | 89   | 92             | 86   | -2   | -100 | 1.28E-6       | 4.70E-6   | 1.54E-5   |  |
| RFX 393                                                      | 0.685     | 1.323 | 1.358                                 | 1.334 | 1.239 | 0.080 | 0.112  | 105  | 102            | 87   | -88  | -84  | 8.11E-7       | 1.56E-6   | 3.02E-6   |  |
| SN12C                                                        | 0.391     | 1.784 | 1.773                                 | 1.781 | 1.719 | 0.371 | 0.020  | 99   | 100            | 95   | -5   | -95  | 1.41E-6       | 4.43E-6   | 1.58E-5   |  |
| TK-10                                                        | 0.865     | 1.676 | 1.618                                 | 1.621 | 1.630 | 0.998 | 0.100  | 93   | 93             | 94   | 16   | -88  | 1.85E-6       | 7.17E-6   | 2.15E-5   |  |
| UO-31                                                        | 0.608     | 2.142 | 2.029                                 | 1.962 | 1.804 | 0.285 | -0.007 | 93   | 88             | 78   | -53  | -100 | 8.17E-7       | 1.96E-6   | 4.73E-6   |  |
| Prostate Cancer                                              |           |       |                                       |       |       |       |        |      |                |      |      |      |               |           |           |  |
| PC-3                                                         | 0.440     | 1.517 | 1.515                                 | 1.477 | 1.406 | 0.453 | 0.089  | 100  | 96             | 90   | 1    | -80  | 1.40E-6       | 5.17E-6   | 2.14E-5   |  |
| DU-145                                                       | 0.338     | 1.467 | 1.493                                 | 1.480 | 1.437 | 0.326 | -0.002 | 102  | 101            | 97   | -4   | -100 | 1.47E-6       | 4.61E-6   | 1.52E-5   |  |
| Breast Cancer                                                |           |       |                                       |       |       |       |        |      |                |      |      |      |               |           |           |  |
| MCF7                                                         | 0.346     | 2.158 | 1.966                                 | 1.929 | 1.650 | 0.443 | 0.166  | 89   | 87             | 72   | 5    | -52  | 1.07E-6       | 6.19E-6   | 4.58E-5   |  |
| MDA-MB-231/ATCC                                              | 0.547     | 1.458 | 1.511                                 | 1.536 | 1.487 | 0.707 | 0.081  | 106  | 108            | 103  | 18   | -85  | 2.09E-6       | 7.41E-6   | 2.27E-5   |  |
| HS 578T                                                      | 0.815     | 1.655 | 1.671                                 | 1.681 | 1.631 | 0.952 | 0.593  | 102  | 103            | 97   | 16   | -27  | 1.92E-6       | 1.18E-5   | > 5.00E-5 |  |
| BT-549                                                       | 1.139     | 2.003 | 1.962                                 | 1.978 | 1.880 | 0.803 | 0.053  | 95   | 97             | 86   | -30  | -95  | 1.02E-6       | 2.77E-6   | 1.02E-5   |  |
| T-47D                                                        | 0.703     | 1.599 | 1.461                                 | 1.471 | 1.429 | 0.780 | 0.296  | 85   | 86             | 81   | 9    | -58  | 1.34E-6       | 6.72E-6   | 3.80E-5   |  |
| MDA-MB-468                                                   | 0.640     | 1.327 | 1.331                                 | 1.332 | 1.198 | 0.174 | 0.190  | 101  | 101            | 81   | -73  | -70  | 7.97E-7       | 1.68E-6   | 3.55E-6   |  |

**Figure S22.** Tabular list of the antineoplastic activity exhibited by the pure drug compound **1** (PT162, NSC 796018) in the National Cancer Institute (NCI) Developmental Therapeutics Program (DTP) 60-cancer cell 5-dose testing with the Mean Optical Densities of the used vital stain sulforhodamine B (SRB) retained in the cells given. **Percent Growth**, **GI50 (Growth Inhibition 50%)**



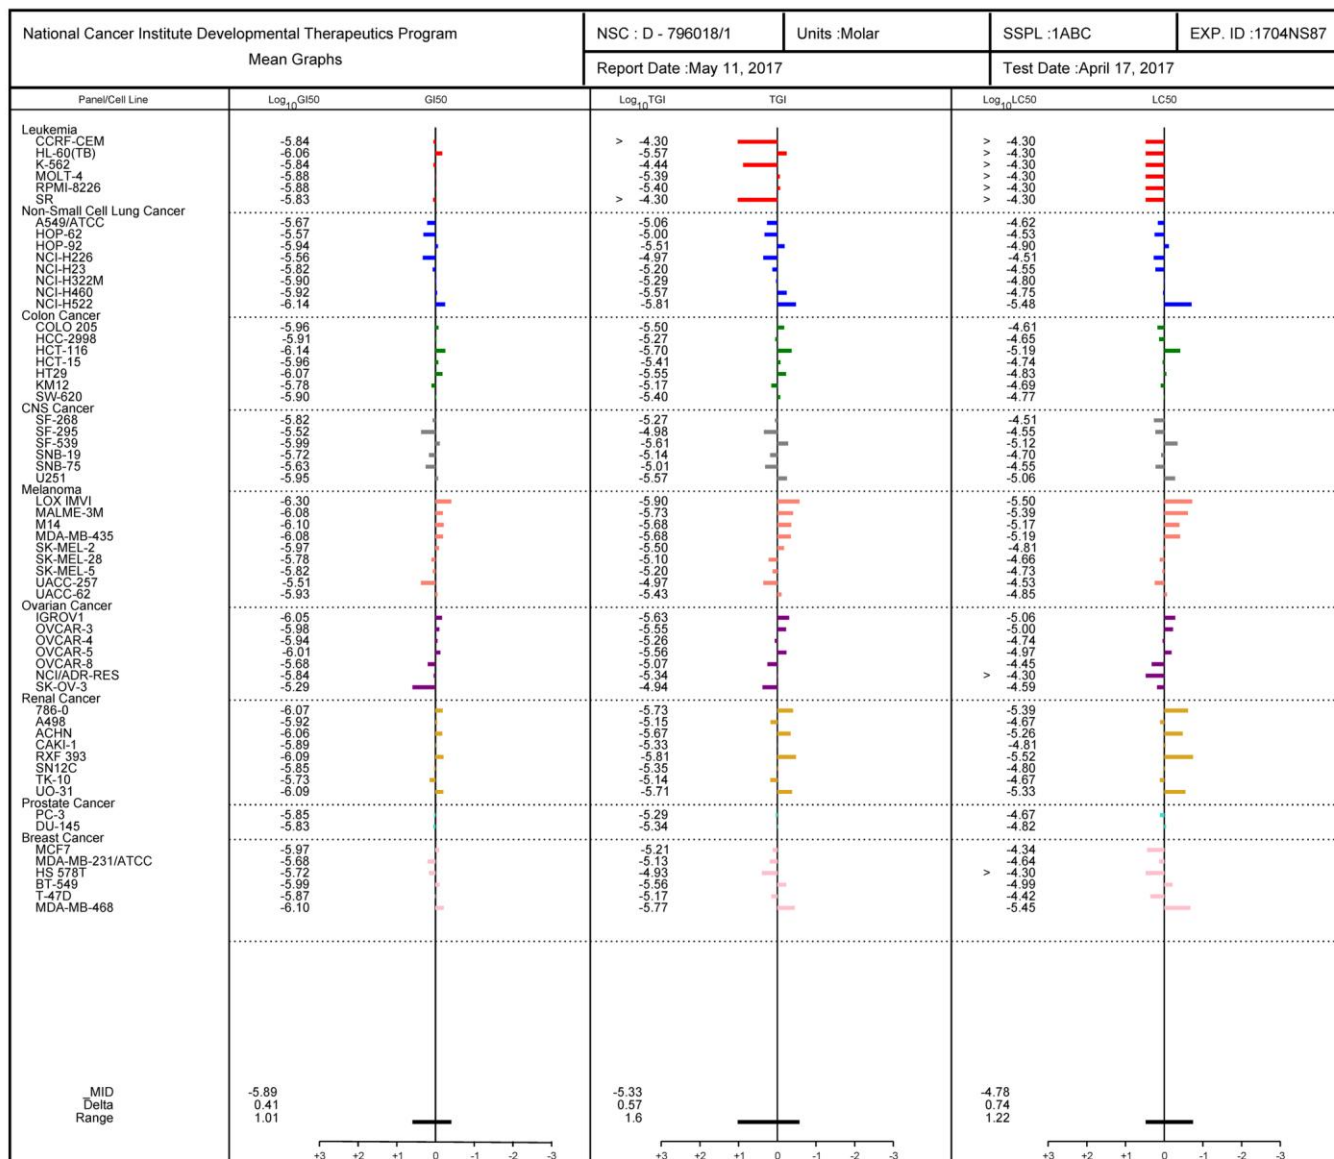

**Figure S23.** Graphic table presentation of the antineoplastic activity exhibited by the pure drug compound **1** (**PT162**, **NSC 796018**) in the National Cancer Institute (NCI) Developmental Therapeutics Program (DTP) 60-cancer cell 5-dose testing with the **Percent Growth**, **GI50** (**Growth Inhibition 50%**), **TGI** (**Total Growth Inhibition = 0% Growth**), and **LC50** (**Lethal Concentration 50% = -50% Growth**) given in linear concentration units. This is the summary of the results expressed in log<sub>10</sub> units. The defined tumor inhibition criterion (**GI50**, **TGI**, or **LC50**) is recalculated in log<sub>10</sub> expression, and the colored bars which indicate then the sensitivity of the individual tumor cell line to the agent are given, but in log<sub>10</sub> units. **Bar to the left: less sensitive**

than mean; Bar to the right: more sensitive than mean. The most important feature is at the bottom of the page: the **MID (Mean of Inhibition Data)** indicates the mean concentration for all tested cell lines required for the drug to reach the defined tumor inhibition criterion (**GI50**, **TGI**, or **LC50**). It is given in **Log<sub>10</sub>GI50**, **Log<sub>10</sub>TGI** and **Log<sub>10</sub>LC50**. From that values the corresponding **MID** is calculated. The more negative the **MID**, the more potent is the drug. The **MID** can be transformed from logarithmic into linear concentrations by the formula:  $c = 10^{\text{MID}}$ .

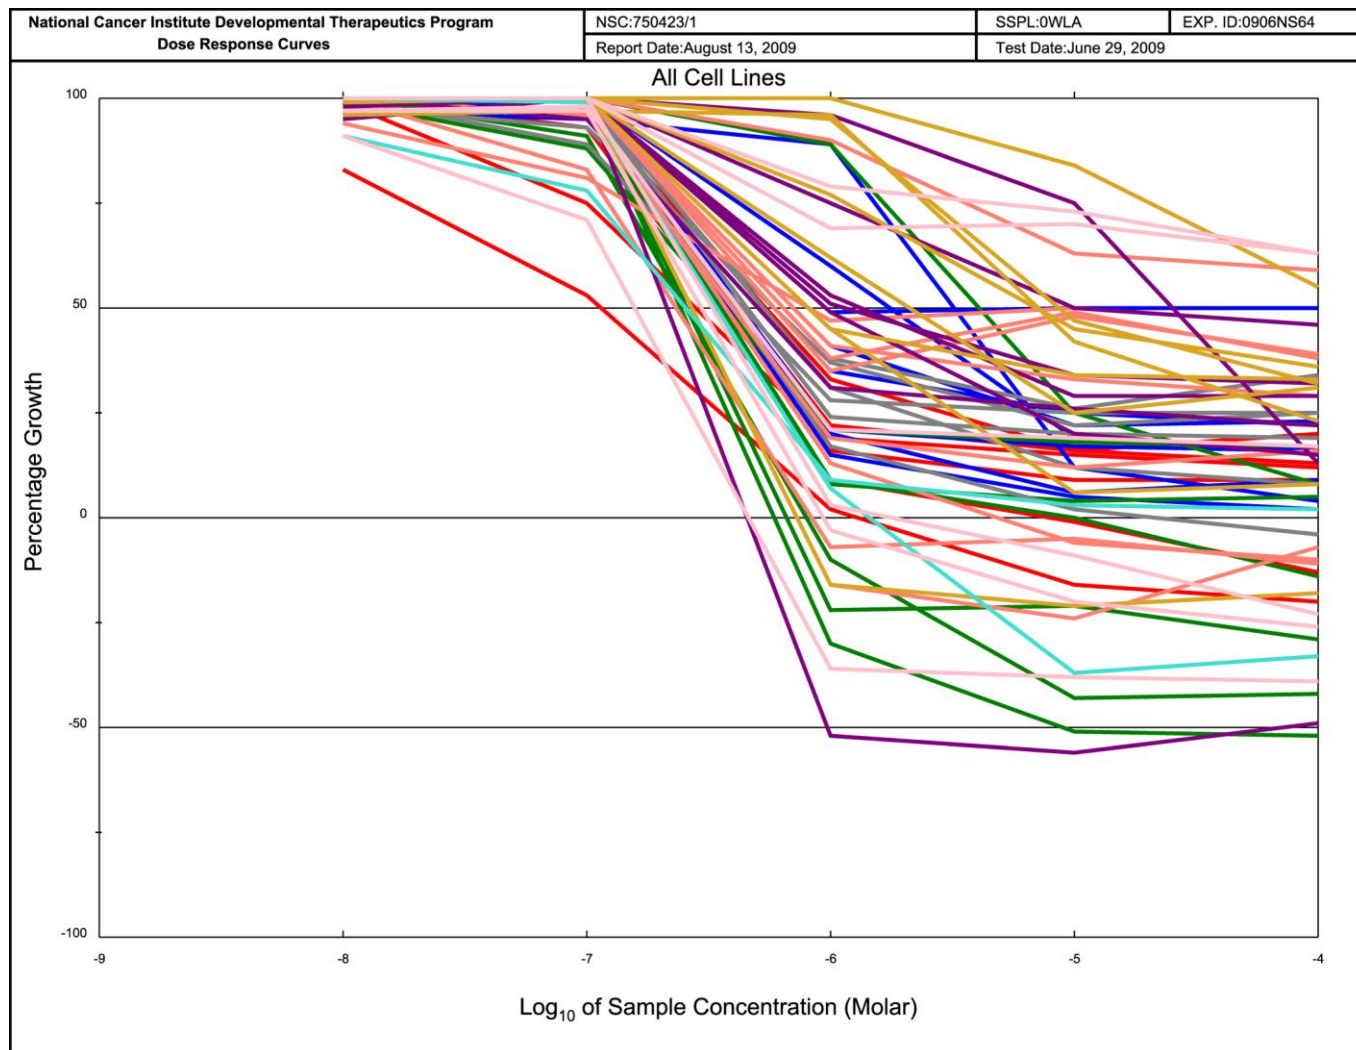

**Figure S24.** Graphic allover presentation of the antineoplastic activity in the National Cancer Institute (NCI) Developmental Therapeutics Program (DTP) 60-cancer cell 5-dose testing exhibited by the drug compound **2** (**PT166**, **NSC 750423**) with **All Cell Lines** in one graphic.

| National Cancer Institute Developmental Therapeutics Program |           |       |                                       |       |       |       |       |      |                |      |      |      |                |           |               |      |
|--------------------------------------------------------------|-----------|-------|---------------------------------------|-------|-------|-------|-------|------|----------------|------|------|------|----------------|-----------|---------------|------|
| In-Vitro Testing Results                                     |           |       |                                       |       |       |       |       |      |                |      |      |      |                |           |               |      |
| NSC : 750423 / 1                                             |           |       | Experiment ID : 0906NS64              |       |       |       |       |      |                |      |      |      | Test Type : 08 |           | Units : Molar |      |
| Report Date : August 13, 2009                                |           |       | Test Date : June 29, 2009             |       |       |       |       |      |                |      |      |      | QNS :          |           | MC :          |      |
| COMI : colch-TSC (84886)                                     |           |       | Stain Reagent : SRB Dual-Pass Related |       |       |       |       |      |                |      |      |      | SSPL : 0WLA    |           |               |      |
| Panel/Cell Line                                              | Time Zero | Ctrl  | Log10 Concentration                   |       |       |       |       |      | Percent Growth |      |      |      |                | GI50      | TGI           | LC50 |
|                                                              |           |       | Mean Optical Densities                |       |       |       |       |      |                |      |      |      |                |           |               |      |
|                                                              |           |       | -8.0                                  | -7.0  | -6.0  | -5.0  | -4.0  | -8.0 | -7.0           | -6.0 | -5.0 | -4.0 |                |           |               |      |
| Leukemia                                                     |           |       |                                       |       |       |       |       |      |                |      |      |      |                |           |               |      |
| CCRF-CEM                                                     | 0.356     | 1.223 | 1.293                                 | 1.199 | 0.545 | 0.496 | 0.531 | 108  | 97             | 22   | 16   | 20   | 4.22E-7        | > 1.00E-4 | > 1.00E-4     |      |
| HL-60(TB)                                                    | 0.825     | 2.422 | 2.153                                 | 1.668 | 0.854 | 0.694 | 0.664 | 83   | 53             | 2    | -16  | -20  | 1.13E-7        | > 1.00E-4 | > 1.00E-4     |      |
| K-562                                                        | 0.287     | 1.715 | 1.711                                 | 1.622 | 0.510 | 0.417 | 0.422 | 100  | 93             | 16   | 9    | 9    | 3.62E-7        | > 1.00E-4 | > 1.00E-4     |      |
| MOLT-4                                                       | 0.609     | 1.986 | 2.143                                 | 1.948 | 1.068 | 0.825 | 0.792 | 111  | 97             | 33   | 16   | 13   | 5.48E-7        | > 1.00E-4 | > 1.00E-4     |      |
| RPMLI-8226                                                   | 0.864     | 1.665 | 1.739                                 | 1.658 | 0.933 | 0.859 | 0.751 | 109  | 99             | 9    | -1   | -13  | 3.49E-7        | 8.65E-6   | > 1.00E-4     |      |
| SR                                                           | 0.312     | 1.029 | 1.020                                 | 0.850 | 0.449 | 0.417 | 0.400 | 99   | 75             | 19   | 15   | 12   | 2.79E-7        | > 1.00E-4 | > 1.00E-4     |      |
| Non-Small Cell Lung Cancer                                   |           |       |                                       |       |       |       |       |      |                |      |      |      |                |           |               |      |
| AS49(ATCC)                                                   | 0.337     | 1.197 | 1.167                                 | 1.154 | 1.102 | 0.444 | 0.375 | 97   | 95             | 89   | 12   | 4    | 3.23E-6        | > 1.00E-4 | > 1.00E-4     |      |
| ERVX                                                         | 0.663     | 1.690 | 1.653                                 | 1.702 | 1.171 | 1.172 | 1.182 | 96   | 101            | 49   | 50   | 50   |                | > 1.00E-4 | > 1.00E-4     |      |
| HOP-62                                                       | 0.341     | 1.030 | 1.041                                 | 1.039 | 0.621 | 0.495 | 0.496 | 102  | 101            | 41   | 22   | 23   | 7.00E-7        | > 1.00E-4 | > 1.00E-4     |      |
| NCI-H226                                                     | 0.619     | 1.115 | 1.148                                 | 1.182 | 0.915 | 0.716 | 0.699 | 107  | 113            | 60   | 19   | 16   | 1.74E-6        | > 1.00E-4 | > 1.00E-4     |      |
| NCI-H23                                                      | 0.352     | 0.990 | 1.015                                 | 1.018 | 0.477 | 0.391 | 0.412 | 104  | 104            | 20   | 6    | 9    | 4.38E-7        | > 1.00E-4 | > 1.00E-4     |      |
| NCI-H322M                                                    | 0.533     | 1.061 | 1.061                                 | 1.090 | 0.720 | 0.665 | 0.649 | 100  | 106            | 35   | 25   | 22   | 6.19E-7        | > 1.00E-4 | > 1.00E-4     |      |
| NCI-H460                                                     | 0.117     | 1.142 | 1.287                                 | 1.240 | 0.275 | 0.165 | 0.138 | 114  | 110            | 15   | 5    | 2    | 4.29E-7        | > 1.00E-4 | > 1.00E-4     |      |
| NCI-H522                                                     | 0.482     | 1.412 | 1.668                                 | 1.706 | 0.682 | 0.639 | 0.633 | 127  | 132            | 21   | 17   | 16   | 5.50E-7        | > 1.00E-4 | > 1.00E-4     |      |
| Colon Cancer                                                 |           |       |                                       |       |       |       |       |      |                |      |      |      |                |           |               |      |
| COLO 205                                                     | 0.180     | 0.657 | 0.737                                 | 0.727 | 0.127 | 0.089 | 0.087 | 117  | 115            | -30  | -51  | -52  | 2.80E-7        | 6.22E-7   | 9.13E-6       |      |
| HCC-2998                                                     | 0.536     | 1.610 | 1.614                                 | 1.667 | 0.420 | 0.424 | 0.382 | 100  | 105            | -22  | -21  | -29  | 2.72E-7        | 6.74E-7   | > 1.00E-4     |      |
| HCT-116                                                      | 0.147     | 1.082 | 1.131                                 | 1.140 | 0.229 | 0.151 | 0.127 | 105  | 106            | 9    |      | -14  | 3.77E-7        | 1.06E-5   | > 1.00E-4     |      |
| HCT-15                                                       | 0.284     | 1.537 | 1.587                                 | 1.568 | 1.394 | 0.595 | 0.380 | 104  | 102            | 89   | 25   | 8    | 4.03E-6        | > 1.00E-4 | > 1.00E-4     |      |
| HT29                                                         | 0.209     | 1.360 | 1.338                                 | 1.328 | 0.296 | 0.259 | 0.262 | 98   | 97             | 8    | 4    | 5    | 3.36E-7        | > 1.00E-4 | > 1.00E-4     |      |
| KM12                                                         | 0.237     | 1.196 | 1.231                                 | 1.110 | 0.214 | 0.135 | 0.138 | 104  | 91             | -10  | -43  | -42  | 2.55E-7        | 8.01E-7   | > 1.00E-4     |      |
| SW-620                                                       | 0.160     | 1.104 | 1.096                                 | 0.995 | 0.355 | 0.328 | 0.321 | 99   | 88             | 21   | 18   | 17   | 3.69E-7        | > 1.00E-4 | > 1.00E-4     |      |
| CNS Cancer                                                   |           |       |                                       |       |       |       |       |      |                |      |      |      |                |           |               |      |
| SF-268                                                       | 0.444     | 1.433 | 1.412                                 | 1.360 | 0.809 | 0.660 | 0.693 | 98   | 93             | 37   | 22   | 25   | 5.81E-7        | > 1.00E-4 | > 1.00E-4     |      |
| SF-295                                                       | 0.687     | 2.195 | 2.253                                 | 2.266 | 1.151 | 0.869 | 0.812 | 104  | 105            | 31   | 12   | 8    | 5.49E-7        | > 1.00E-4 | > 1.00E-4     |      |
| SF-539                                                       | 0.373     | 1.398 | 1.401                                 | 1.442 | 0.546 | 0.393 | 0.357 | 100  | 104            | 17   | 2    | -4   | 4.18E-7        | 2.05E-5   | > 1.00E-4     |      |
| SNB-19                                                       | 0.607     | 1.561 | 1.625                                 | 1.665 | 0.971 | 0.852 | 0.928 | 107  | 111            | 38   | 26   | 34   | 6.86E-7        | > 1.00E-4 | > 1.00E-4     |      |
| SNB-75                                                       | 0.502     | 0.959 | 0.968                                 | 0.908 | 0.632 | 0.617 | 0.617 | 102  | 89             | 28   | 25   | 25   | 4.41E-7        | > 1.00E-4 | > 1.00E-4     |      |
| U251                                                         | 0.207     | 1.094 | 1.088                                 | 1.141 | 0.421 | 0.388 | 0.380 | 99   | 105            | 24   | 20   | 19   | 4.79E-7        | > 1.00E-4 | > 1.00E-4     |      |
| Melanoma                                                     |           |       |                                       |       |       |       |       |      |                |      |      |      |                |           |               |      |
| LOX IMVI                                                     | 0.261     | 1.596 | 1.631                                 | 1.653 | 0.802 | 0.706 | 0.650 | 103  | 104            | 41   | 33   | 29   | 7.10E-7        | > 1.00E-4 | > 1.00E-4     |      |
| MALME-3M                                                     | 0.417     | 0.566 | 0.574                                 | 0.560 | 0.445 | 0.436 | 0.442 | 106  | 96             | 19   | 12   | 16   | 3.94E-7        | > 1.00E-4 | > 1.00E-4     |      |
| M14                                                          | 0.317     | 1.044 | 1.086                                 | 1.080 | 0.266 | 0.240 | 0.294 | 106  | 105            | -16  | -24  | -7   | 2.84E-7        | 7.35E-7   | > 1.00E-4     |      |
| MDA-MB-435                                                   | 0.370     | 1.324 | 1.361                                 | 1.163 | 0.345 | 0.351 | 0.329 | 104  | 83             | -7   | -5   | -11  | 2.33E-7        | 8.38E-7   | > 1.00E-4     |      |
| SK-MEL-2                                                     | 0.484     | 0.922 | 0.992                                 | 1.029 | 0.879 | 0.758 | 0.740 | 116  | 125            | 90   | 63   | 59   | > 1.00E-4      | > 1.00E-4 | > 1.00E-4     |      |
| SK-MEL-28                                                    | 0.262     | 0.870 | 0.832                                 | 0.754 | 0.546 | 0.569 | 0.543 | 94   | 81             | 47   | 50   | 46   |                | > 1.00E-4 | > 1.00E-4     |      |
| UACC-57                                                      | 0.492     | 1.719 | 2.052                                 | 2.059 | 0.764 | 0.535 | 0.514 | 100  | 99             | 13   | -6   | -10  | 3.73E-7        | 4.71E-6   | > 1.00E-4     |      |
| UACC-62                                                      | 0.448     | 0.815 | 0.816                                 | 0.818 | 0.588 | 0.629 | 0.589 | 100  | 101            | 38   | 49   | 38   | 6.46E-7        | > 1.00E-4 | > 1.00E-4     |      |
| UACC-62                                                      | 0.821     | 2.155 | 2.248                                 | 2.246 | 1.294 | 1.457 | 1.338 | 107  | 107            | 35   | 48   | 39   | 6.25E-7        | > 1.00E-4 | > 1.00E-4     |      |
| Ovarian Cancer                                               |           |       |                                       |       |       |       |       |      |                |      |      |      |                |           |               |      |
| IGROV1                                                       | 0.360     | 1.694 | 1.624                                 | 1.727 | 1.043 | 0.815 | 0.784 | 95   | 102            | 51   | 34   | 32   | 1.18E-6        | > 1.00E-4 | > 1.00E-4     |      |
| OVCAR-3                                                      | 0.320     | 0.943 | 0.965                                 | 0.952 | 0.154 | 0.140 | 0.165 | 104  | 101            | -52  | -56  | -49  | 2.17E-7        | 4.59E-7   |               |      |
| OVCAR-4                                                      | 0.463     | 1.261 | 1.315                                 | 1.219 | 0.713 | 0.672 | 0.635 | 107  | 95             | 31   | 26   | 22   | 5.07E-7        | > 1.00E-4 | > 1.00E-4     |      |
| OVCAR-5                                                      | 0.348     | 0.719 | 0.699                                 | 0.720 | 0.626 | 0.532 | 0.518 | 95   | 100            | 75   | 50   | 46   | 9.67E-6        | > 1.00E-4 | > 1.00E-4     |      |
| OVCAR-8                                                      | 0.507     | 1.475 | 1.514                                 | 1.542 | 0.984 | 0.702 | 0.650 | 104  | 107            | 49   | 20   | 15   | 9.70E-7        | > 1.00E-4 | > 1.00E-4     |      |
| NCI/ADR-RES                                                  | 0.222     | 0.710 | 0.702                                 | 0.714 | 0.690 | 0.589 | 0.284 | 98   | 101            | 96   | 75   | 13   | 2.53E-5        | > 1.00E-4 | > 1.00E-4     |      |
| SK-OV-3                                                      | 0.510     | 1.213 | 1.385                                 | 1.453 | 0.886 | 0.715 | 0.712 | 124  | 134            | 53   | 29   | 29   | 1.39E-6        | > 1.00E-4 | > 1.00E-4     |      |
| Renal Cancer                                                 |           |       |                                       |       |       |       |       |      |                |      |      |      |                |           |               |      |
| 786-0                                                        | 0.371     | 1.447 | 1.471                                 | 1.491 | 0.854 | 0.440 | 0.461 | 102  | 104            | 45   | 6    | 8    | 8.18E-7        | > 1.00E-4 | > 1.00E-4     |      |
| A498                                                         | 0.688     | 1.527 | 1.621                                 | 1.608 | 1.207 | 0.897 | 0.949 | 111  | 110            | 62   | 25   | 31   | 2.09E-6        | > 1.00E-4 | > 1.00E-4     |      |
| ACHN                                                         | 0.320     | 1.117 | 1.222                                 | 1.221 | 1.076 | 0.692 | 0.574 | 113  | 113            | 95   | 47   | 32   | 8.50E-6        | > 1.00E-4 | > 1.00E-4     |      |
| CAKI-1                                                       | 0.659     | 1.875 | 1.821                                 | 1.835 | 1.822 | 1.171 | 0.942 | 96   | 97             | 96   | 42   | 23   | 7.12E-6        | > 1.00E-4 | > 1.00E-4     |      |
| RXF 393                                                      | 0.650     | 0.840 | 0.858                                 | 0.858 | 0.547 | 0.514 | 0.535 | 110  | 109            | -16  | -21  | -18  | 2.98E-7        | 7.47E-7   | > 1.00E-4     |      |
| SN12C                                                        | 0.370     | 1.309 | 1.301                                 | 1.362 | 0.793 | 0.691 | 0.678 | 99   | 106            | 45   | 34   | 33   | 8.28E-7        | > 1.00E-4 | > 1.00E-4     |      |
| TK-10                                                        | 0.504     | 0.957 | 1.011                                 | 1.036 | 0.852 | 0.706 | 0.669 | 112  | 117            | 77   | 45   | 36   | 6.77E-6        | > 1.00E-4 | > 1.00E-4     |      |
| UO-31                                                        | 0.645     | 1.192 | 1.278                                 | 1.279 | 1.251 | 1.105 | 0.944 | 116  | 116            | 111  | 84   | 55   | > 1.00E-4      | > 1.00E-4 | > 1.00E-4     |      |
| Prostate Cancer                                              |           |       |                                       |       |       |       |       |      |                |      |      |      |                |           |               |      |
| PC-3                                                         | 1.013     | 2.121 | 2.023                                 | 1.875 | 1.118 | 1.048 | 1.039 | 91   | 78             | 9    | 3    | 2    | 2.55E-7        | > 1.00E-4 | > 1.00E-4     |      |
| DU-145                                                       | 0.296     | 1.074 | 1.079                                 | 1.068 | 0.350 | 0.187 | 0.199 | 101  | 99             | 7    | -37  | -33  | 3.41E-7        | 1.44E-6   | > 1.00E-4     |      |
| Breast Cancer                                                |           |       |                                       |       |       |       |       |      |                |      |      |      |                |           |               |      |
| MCF7                                                         | 0.241     | 1.345 | 1.312                                 | 1.320 | 0.468 | 0.447 | 0.434 | 97   | 98             | 21   | 19   | 17   | 4.15E-7        | > 1.00E-4 | > 1.00E-4     |      |
| MDA-MB-231(ATCC)                                             | 0.446     | 0.922 | 0.990                                 | 0.962 | 0.462 | 0.408 | 0.342 | 114  | 108            | 3    | -9   | -23  | 3.59E-7        | 1.88E-6   | > 1.00E-4     |      |
| HS 578T                                                      | 0.568     | 1.728 | 1.974                                 | 1.959 | 1.484 | 1.418 | 1.299 | 121  | 120            | 79   | 73   | 63   | > 1.00E-4      | > 1.00E-4 | > 1.00E-4     |      |
| BT-549                                                       | 0.938     | 1.523 | 1.506                                 | 1.506 | 0.906 | 0.749 | 0.698 | 97   | 97             | -3   | -20  | -26  | 2.94E-7        | 9.24E-7   | > 1.00E-4     |      |
| T-47D                                                        | 0.646     | 1.231 | 1.240                                 | 1.234 | 1.047 | 1.054 | 1.012 | 102  | 101            | 69   | 70   | 63   | > 1.00E-4      | > 1.00E-4 | > 1.00E-4     |      |
| MDA-MB-468                                                   | 0.476     | 1.315 | 1.241                                 | 1.074 | 0.306 | 0.295 | 0.289 | 91   | 71             | -36  | -38  | -39  | 1.58E-7        | 4.64E-7   | > 1.00E-4     |      |

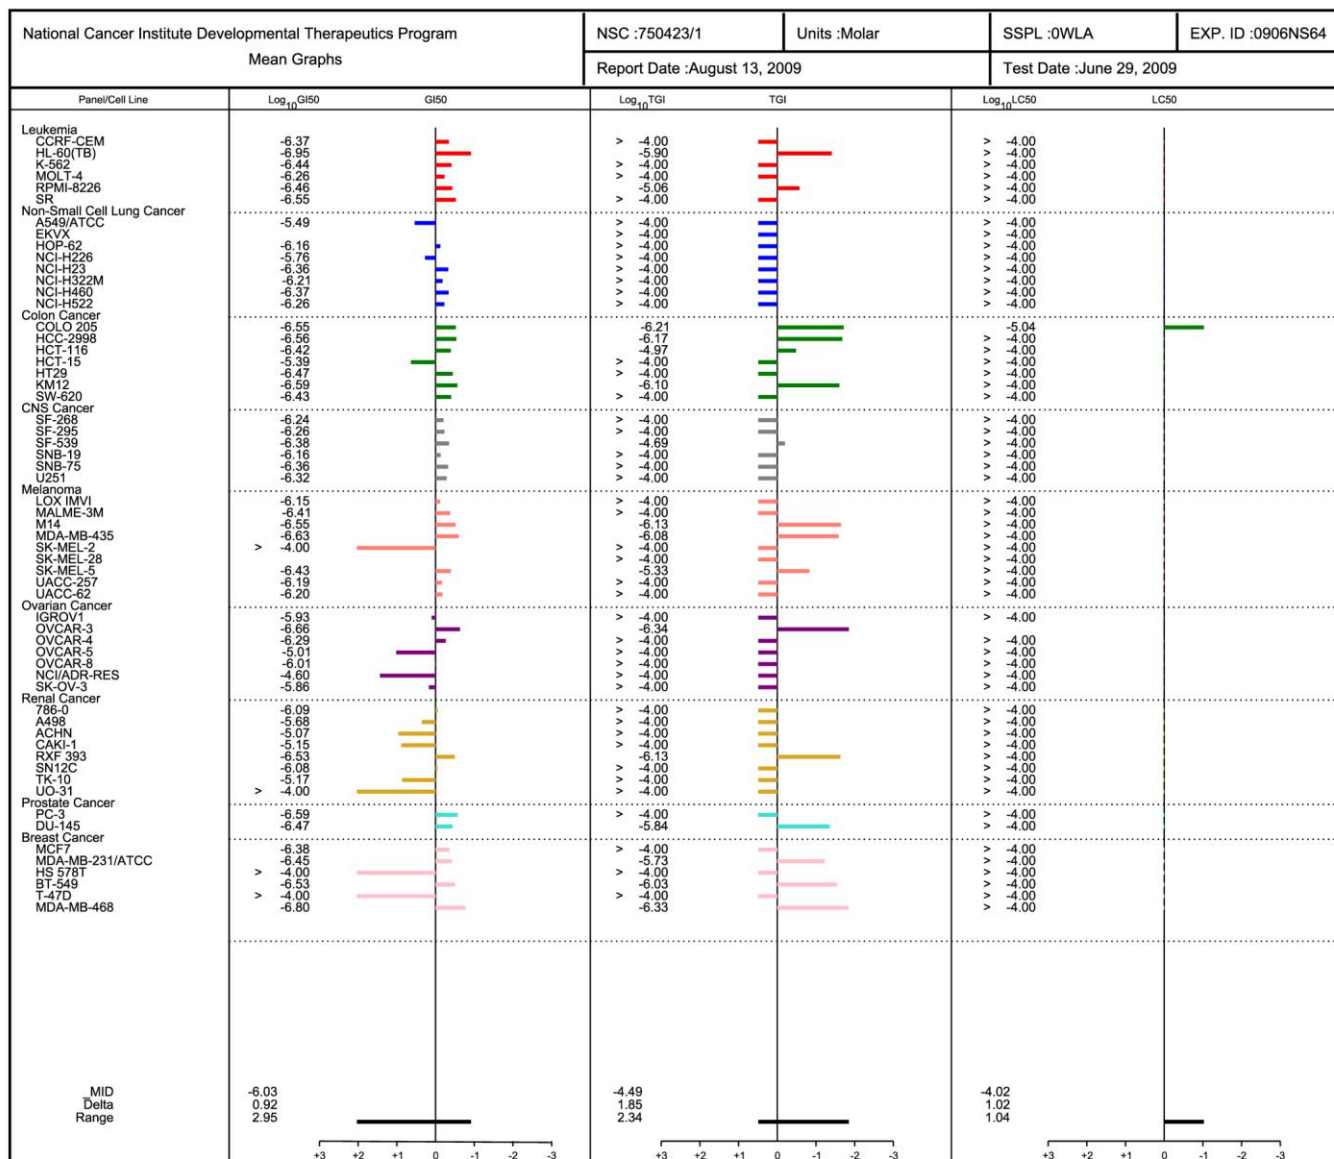

**Figure S26.** Graphic table presentation of the antineoplastic activity exhibited by the drug compound **2** (PT166, NSC 750423) in the National Cancer Institute (NCI) Developmental Therapeutics Program (DTP) 60-cancer cell 5-dose testing with the **Percent Growth, GI50** (Growth Inhibition 50%), **TGI** (Total Growth Inhibition = 0% Growth), and **LC50** (Lethal Concentration 50% = -50% Growth) given in linear concentration units. This is the summary of the results expressed in log<sub>10</sub> units. The defined tumor inhibition criterion (**GI50**, **TGI**, or **LC50**) is recalculated in log<sub>10</sub> expression, and the colored bars which indicate then the sensitivity of the individual tumor cell line to the agent are given, but in log<sub>10</sub> units. **Bar to the left: less sensitive**

than mean; Bar to the right: more sensitive than mean. The most important feature is at the bottom of the page: the **MID (Mean of Inhibition Data)** indicates the mean concentration for all tested cell lines required for the drug to reach the defined tumor inhibition criterion (**GI50**, **TGI**, or **LC50**). It is given in **Log<sub>10</sub>GI50**, **Log<sub>10</sub>TGI** and **Log<sub>10</sub>LC50**. From that values the corresponding **MID** is calculated. The more negative the **MID**, the more potent is the drug. The **MID** can be transformed from logarithmic into linear concentrations by the formula:  $c = 10^{\text{MID}}$ .

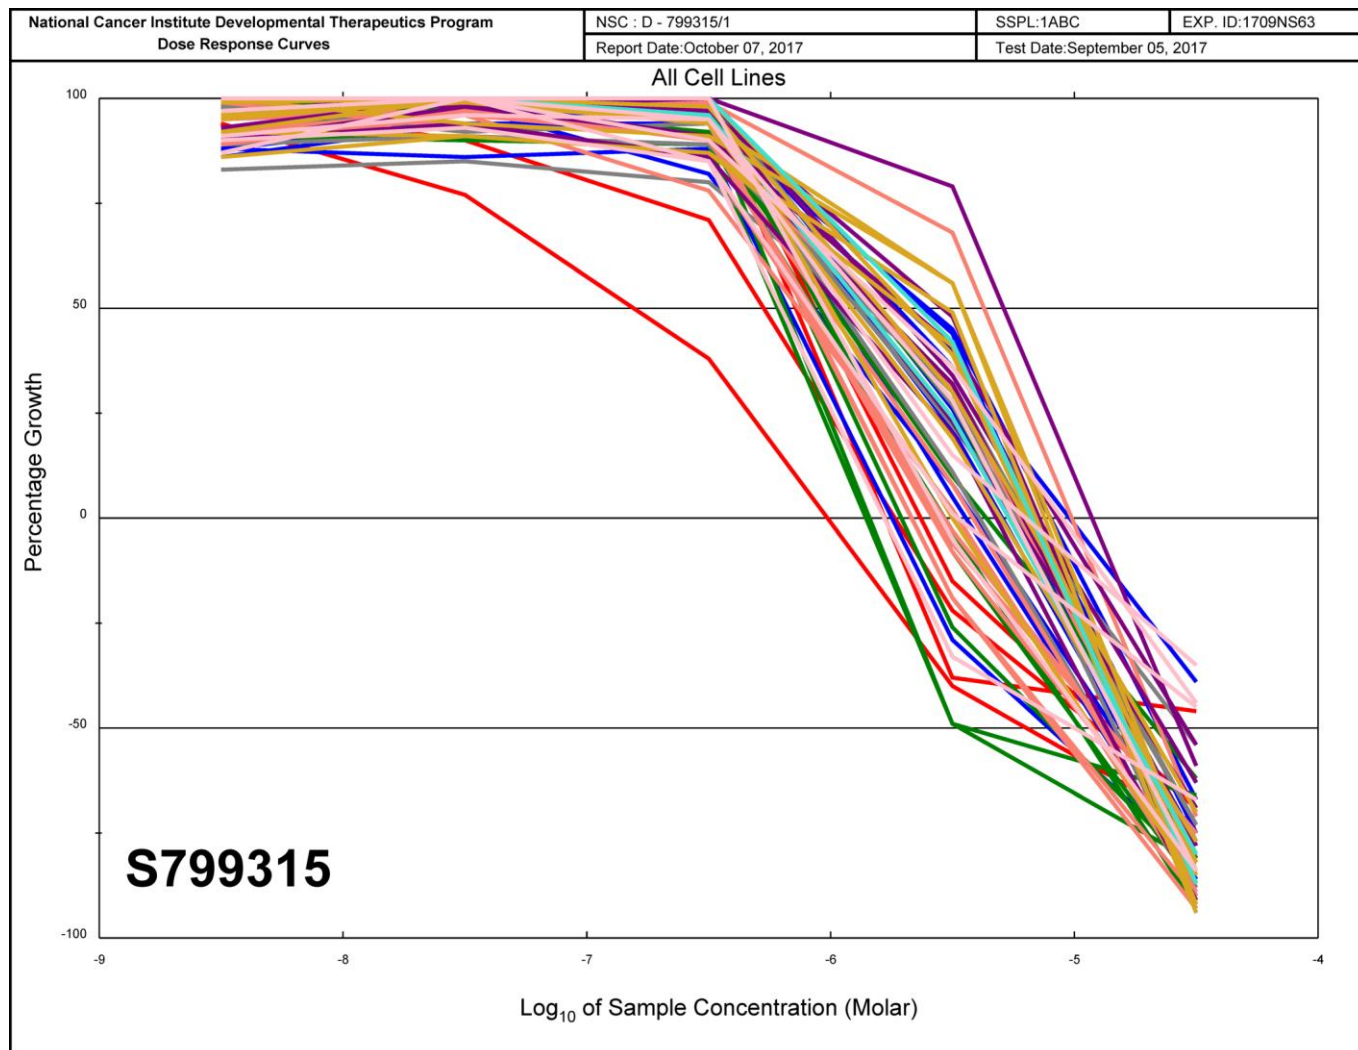

**Figure S27.** Graphic allover presentation of the antineoplastic activity in the National Cancer Institute (NCI) Developmental Therapeutics Program (DTP) 60-cancer cell 5-dose testing exhibited by the drug compound **3** (**PT167**, **NSC 799315**) with **All Cell Lines** in one graphic.



| National Cancer Institute Developmental Therapeutics Program |       |       |                                       |       |       |       |       |                |      |      |               |      |         |         |           |
|--------------------------------------------------------------|-------|-------|---------------------------------------|-------|-------|-------|-------|----------------|------|------|---------------|------|---------|---------|-----------|
| In-Vitro Testing Results                                     |       |       |                                       |       |       |       |       |                |      |      |               |      |         |         |           |
| NSC : D - 799315 / 1                                         |       |       | Experiment ID : 1709NS63              |       |       |       |       | Test Type : 08 |      |      | Units : Molar |      |         |         |           |
| Report Date : October 07, 2017                               |       |       | Test Date : September 05, 2017        |       |       |       |       | QNS :          |      |      | MC :          |      |         |         |           |
| COMI : PT167                                                 |       |       | Stain Reagent : SRB Dual-Pass Related |       |       |       |       | SSPL : 1ABC    |      |      |               |      |         |         |           |
|                                                              |       |       |                                       |       |       |       |       |                |      |      |               |      |         |         |           |
| Log10 Concentration                                          |       |       |                                       |       |       |       |       |                |      |      |               |      |         |         |           |
| Panel/Cell Line                                              | Time  |       | Mean Optical Densities                |       |       |       |       | Percent Growth |      |      |               |      |         |         |           |
|                                                              | Zero  | Ctrl  | -8.5                                  | -7.5  | -6.5  | -5.5  | -4.5  | -8.5           | -7.5 | -6.5 | -5.5          | -4.5 | GI50    | TGI     | LC50      |
| Leukemia                                                     |       |       |                                       |       |       |       |       |                |      |      |               |      |         |         |           |
| CCRF-CEM                                                     | 0.461 | 2.449 | 2.482                                 | 2.556 | 2.443 | 0.393 | 0.144 | 102            | 105  | 100  | -15           | -69  | 9.04E-7 | 2.47E-6 | 1.49E-5   |
| HL-60(TB)                                                    | 0.857 | 3.020 | 2.897                                 | 2.528 | 1.689 | 0.517 | 0.236 | 94             | 77   | 38   | -40           | -73  | 1.68E-7 | 1.03E-6 | 6.85E-6   |
| MOLT-4                                                       | 0.638 | 2.703 | 2.656                                 | 2.504 | 2.108 | 0.498 | 0.201 | 98             | 90   | 71   | -22           | -69  | 5.62E-7 | 1.93E-6 | 1.33E-5   |
| RPMI-8226                                                    | 0.451 | 1.817 | 1.889                                 | 1.916 | 1.799 | 0.281 | 0.242 | 105            | 107  | 99   | -38           | -46  | 7.57E-7 | 1.76E-6 | > 3.33E-5 |
| Non-Small Cell Lung Cancer                                   |       |       |                                       |       |       |       |       |                |      |      |               |      |         |         |           |
| A549/ATCC                                                    | 0.341 | 1.522 | 1.533                                 | 1.524 | 1.532 | 0.654 | 0.078 | 101            | 100  | 101  | 26            | -77  | 1.61E-6 | 6.00E-6 | 1.82E-5   |
| EKVX                                                         | 0.693 | 2.180 | 2.008                                 | 2.089 | 2.090 | 1.368 | 0.231 | 88             | 94   | 94   | 45            | -67  | 2.68E-6 | 8.46E-6 | 2.36E-5   |
| HOP-62                                                       | 0.633 | 1.719 | 1.565                                 | 1.652 | 1.632 | 1.068 | 0.159 | 86             | 94   | 92   | 40            | -75  | 2.14E-6 | 7.43E-6 | 2.02E-5   |
| HOP-92                                                       | 1.136 | 1.750 | 1.704                                 | 1.738 | 1.639 | 1.184 | 0.223 | 93             | 98   | 82   | 8             | -80  | 8.97E-7 | 4.08E-6 | 1.51E-5   |
| NCI-H226                                                     | 0.603 | 1.414 | 1.429                                 | 1.431 | 1.398 | 0.893 | 0.366 | 102            | 102  | 98   | 36            | -39  | 1.96E-6 | 9.97E-6 | > 3.33E-5 |
| NCI-H23                                                      | 0.495 | 1.655 | 1.654                                 | 1.628 | 1.620 | 0.739 | 0.091 | 100            | 98   | 97   | 21            | -82  | 1.38E-6 | 5.33E-6 | 1.64E-5   |
| NCI-H322M                                                    | 0.700 | 1.763 | 1.748                                 | 1.716 | 1.717 | 1.170 | 0.055 | 99             | 96   | 96   | 44            | -92  | 2.57E-6 | 7.03E-6 | 1.63E-5   |
| NCI-H460                                                     | 0.246 | 1.834 | 1.927                                 | 1.994 | 1.961 | 0.327 | 0.036 | 106            | 110  | 108  | 5             | -86  | 1.22E-6 | 3.79E-6 | 1.35E-5   |
| NCI-H522                                                     | 0.948 | 2.248 | 2.098                                 | 2.062 | 2.086 | 0.673 | 0.174 | 88             | 86   | 88   | -29           | -82  | 6.99E-7 | 1.88E-6 | 8.33E-6   |
| Colon Cancer                                                 |       |       |                                       |       |       |       |       |                |      |      |               |      |         |         |           |
| COLO 205                                                     | 0.433 | 1.448 | 1.425                                 | 1.472 | 1.398 | 0.219 | 0.147 | 98             | 102  | 95   | -49           | -66  | 6.83E-7 | 1.52E-6 | 3.61E-6   |
| HCC-2998                                                     | 0.479 | 1.564 | 1.468                                 | 1.450 | 1.440 | 0.244 | 0.085 | 91             | 90   | 89   | -49           | -82  | 6.35E-7 | 1.47E-6 | 3.55E-6   |
| HCT-116                                                      | 0.152 | 1.300 | 1.211                                 | 1.263 | 1.187 | 0.147 | 0.010 | 92             | 97   | 90   | -3            | -93  | 8.96E-7 | 3.07E-6 | 1.10E-5   |
| HCT-15                                                       | 0.218 | 1.575 | 1.470                                 | 1.543 | 1.523 | 0.590 | 0.042 | 92             | 98   | 96   | 27            | -81  | 1.56E-6 | 5.96E-6 | 1.72E-5   |
| HT29                                                         | 0.184 | 0.975 | 0.982                                 | 0.980 | 0.968 | 0.170 | 0.023 | 101            | 101  | 99   | -8            | -88  | 9.58E-7 | 2.81E-6 | 1.13E-5   |
| KM12                                                         | 0.366 | 1.900 | 1.874                                 | 1.856 | 1.782 | 0.513 | 0.138 | 98             | 97   | 92   | 10            | -62  | 1.08E-6 | 4.52E-6 | 2.25E-5   |
| SW-620                                                       | 0.245 | 1.570 | 1.638                                 | 1.631 | 1.544 | 0.182 | 0.040 | 105            | 105  | 98   | -26           | -84  | 8.14E-7 | 2.06E-6 | 8.74E-6   |
| CNS Cancer                                                   |       |       |                                       |       |       |       |       |                |      |      |               |      |         |         |           |
| SF-268                                                       | 0.648 | 2.073 | 2.041                                 | 1.963 | 1.990 | 0.965 | 0.301 | 98             | 92   | 94   | 22            | -54  | 1.37E-6 | 6.54E-6 | 2.99E-5   |
| SF-295                                                       | 0.787 | 2.563 | 2.370                                 | 2.402 | 2.368 | 1.323 | 0.075 | 89             | 91   | 89   | 30            | -90  | 1.53E-6 | 5.92E-6 | 1.54E-5   |
| SF-539                                                       | 0.784 | 2.356 | 2.243                                 | 2.299 | 2.275 | 0.956 | 0.097 | 93             | 96   | 95   | 11            | -88  | 1.14E-6 | 4.30E-6 | 1.38E-5   |
| SNB-19                                                       | 0.422 | 1.532 | 1.536                                 | 1.626 | 1.553 | 0.723 | 0.113 | 100            | 108  | 102  | 27            | -73  | 1.65E-6 | 6.20E-6 | 1.95E-5   |
| SNB-75                                                       | 0.874 | 1.816 | 1.657                                 | 1.677 | 1.631 | 1.172 | 0.237 | 83             | 85   | 80   | 32            | -73  | 1.40E-6 | 6.68E-6 | 2.01E-5   |
| Melanoma                                                     |       |       |                                       |       |       |       |       |                |      |      |               |      |         |         |           |
| LOX IMVI                                                     | 0.360 | 2.108 | 2.017                                 | 2.054 | 1.943 | 0.337 | 0.089 | 95             | 97   | 91   | -6            | -75  | 8.73E-7 | 2.86E-6 | 1.43E-5   |
| MALME-3M                                                     | 0.535 | 1.269 | 1.265                                 | 1.218 | 1.160 | 0.517 | 0.125 | 99             | 93   | 85   | -3            | -77  | 8.30E-7 | 3.04E-6 | 1.44E-5   |
| M14                                                          | 0.339 | 1.194 | 1.148                                 | 1.183 | 1.148 | 0.275 | 0.033 | 95             | 99   | 95   | -19           | -90  | 8.22E-7 | 2.26E-6 | 9.06E-6   |
| MDA-MB-435                                                   | 0.461 | 2.023 | 1.847                                 | 1.965 | 1.680 | 0.493 | 0.051 | 89             | 96   | 78   | 2             | -89  | 7.79E-7 | 3.50E-6 | 1.24E-5   |
| SK-MEL-2                                                     | 0.961 | 2.171 | 2.118                                 | 2.127 | 2.059 | 0.884 | 0.177 | 96             | 96   | 91   | -8            | -82  | 8.61E-7 | 2.76E-6 | 1.24E-5   |
| SK-MEL-28                                                    | 0.593 | 1.761 | 1.665                                 | 1.727 | 1.641 | 0.690 | 0.077 | 92             | 97   | 90   | 8             | -87  | 1.02E-6 | 4.07E-6 | 1.36E-5   |
| SK-MEL-5                                                     | 0.640 | 2.822 | 2.761                                 | 2.828 | 2.681 | 0.517 | 0.043 | 97             | 100  | 94   | -19           | -93  | 8.10E-7 | 2.25E-6 | 8.65E-6   |
| UACC-257                                                     | 1.116 | 2.133 | 2.086                                 | 2.182 | 2.119 | 1.811 | 0.327 | 95             | 105  | 99   | 68            | -71  | 4.51E-6 | 1.03E-5 | 2.36E-5   |
| UACC-62                                                      | 0.845 | 2.428 | 2.362                                 | 2.385 | 2.274 | 1.342 | 0.171 | 96             | 97   | 90   | 31            | -80  | 1.61E-6 | 6.38E-6 | 1.80E-5   |
| Ovarian Cancer                                               |       |       |                                       |       |       |       |       |                |      |      |               |      |         |         |           |
| IGROV1                                                       | 0.536 | 1.959 | 2.009                                 | 1.995 | 1.925 | 0.865 | 0.169 | 103            | 103  | 98   | 23            | -69  | 1.45E-6 | 5.95E-6 | 2.09E-5   |
| OVCAR-3                                                      | 0.498 | 1.851 | 1.697                                 | 1.643 | 1.547 | 0.870 | 0.110 | 104            | 99   | 91   | 32            | -78  | 1.66E-6 | 6.53E-6 | 1.85E-5   |
| OVCAR-4                                                      | 0.624 | 1.245 | 1.185                                 | 1.232 | 1.188 | 0.877 | 0.286 | 90             | 98   | 91   | 41            | -54  | 2.17E-6 | 8.94E-6 | 3.00E-5   |
| OVCAR-5                                                      | 0.527 | 1.467 | 1.371                                 | 1.411 | 1.338 | 0.715 | 0.046 | 90             | 94   | 86   | 20            | -91  | 1.17E-6 | 5.03E-6 | 1.42E-5   |
| OVCAR-8                                                      | 0.403 | 1.457 | 1.515                                 | 1.528 | 1.536 | 0.765 | 0.148 | 105            | 107  | 107  | 34            | -63  | 2.03E-6 | 7.49E-6 | 2.43E-5   |
| NCI/ADR-RES                                                  | 0.428 | 1.273 | 1.280                                 | 1.252 | 1.278 | 1.099 | 0.175 | 101            | 98   | 101  | 79            | -59  | 5.43E-6 | 1.25E-5 | 2.86E-5   |
| SK-OV-3                                                      | 0.689 | 1.473 | 1.417                                 | 1.479 | 1.449 | 1.064 | 0.087 | 93             | 101  | 97   | 48            | -87  | 3.00E-6 | 7.51E-6 | 1.76E-5   |
| Renal Cancer                                                 |       |       |                                       |       |       |       |       |                |      |      |               |      |         |         |           |
| 786-0                                                        | 0.443 | 1.813 | 1.755                                 | 1.803 | 1.737 | 0.706 | 0.104 | 96             | 99   | 94   | 19            | -77  | 1.30E-6 | 5.28E-6 | 1.76E-5   |
| A498                                                         | 1.401 | 1.875 | 1.938                                 | 1.910 | 1.883 | 1.393 | 0.178 | 113            | 107  | 102  | .             | -87  | 1.07E-6 | 3.28E-6 | 1.24E-5   |
| ACHN                                                         | 0.423 | 1.617 | 1.516                                 | 1.612 | 1.544 | 1.098 | 0.033 | 92             | 100  | 94   | 56            | -92  | 3.68E-6 | 7.99E-6 | 1.73E-5   |
| CAKI-1                                                       | 0.470 | 2.123 | 1.894                                 | 1.967 | 1.908 | 1.286 | 0.030 | 86             | 91   | 87   | 49            | -94  | 3.20E-6 | 7.37E-6 | 1.65E-5   |
| RFX 393                                                      | 0.723 | 1.349 | 1.317                                 | 1.374 | 1.336 | 0.912 | 0.214 | 95             | 104  | 98   | 30            | -70  | 1.70E-6 | 6.65E-6 | 2.09E-5   |
| SN12C                                                        | 0.570 | 1.726 | 1.713                                 | 1.791 | 1.741 | 1.024 | 0.087 | 99             | 106  | 101  | 39            | -85  | 2.23E-6 | 6.90E-6 | 1.74E-5   |
| TK-10                                                        | 0.681 | 1.672 | 1.687                                 | 1.610 | 1.581 | 1.233 | 0.110 | 101            | 94   | 91   | 56            | -84  | 3.66E-6 | 8.35E-6 | 1.90E-5   |
| UO-31                                                        | 0.517 | 1.694 | 1.601                                 | 1.592 | 1.542 | 1.005 | 0.092 | 92             | 91   | 87   | 41            | -82  | 2.16E-6 | 7.20E-6 | 1.83E-5   |
| Prostate Cancer                                              |       |       |                                       |       |       |       |       |                |      |      |               |      |         |         |           |
| PC-3                                                         | 0.366 | 1.536 | 1.498                                 | 1.536 | 1.494 | 0.644 | 0.074 | 97             | 100  | 96   | 24            | -80  | 1.45E-6 | 5.64E-6 | 1.71E-5   |
| DU-145                                                       | 0.330 | 1.311 | 1.319                                 | 1.359 | 1.314 | 0.746 | 0.045 | 101            | 105  | 100  | 42            | -87  | 2.46E-6 | 7.10E-6 | 1.73E-5   |
| Breast Cancer                                                |       |       |                                       |       |       |       |       |                |      |      |               |      |         |         |           |
| MCF7                                                         | 0.402 | 2.309 | 2.117                                 | 2.178 | 2.018 | 0.414 | 0.223 | 90             | 93   | 85   | 1             | -45  | 8.62E-7 | 3.44E-6 | > 3.33E-5 |
| MDA-MB-231/ATCC                                              | 0.623 | 1.590 | 1.619                                 | 1.624 | 1.587 | 0.593 | 0.101 | 103            | 104  | 100  | -5            | -84  | 9.94E-7 | 2.99E-6 | 1.24E-5   |
| HS 578T                                                      | 0.866 | 1.542 | 1.544                                 | 1.584 | 1.508 | 0.970 | 0.567 | 100            | 106  | 95   | 15            | -35  | 1.22E-6 | 6.76E-6 | > 3.33E-5 |
| BT-549                                                       | 0.788 | 1.785 | 1.698                                 | 1.740 | 1.730 | 1.065 | 0.124 | 91             | 96   | 95   | 28            | -84  | 1.55E-6 | 5.89E-6 | 1.65E-5   |
| T-47D                                                        | 0.691 | 1.313 | 1.232                                 | 1.332 | 1.248 | 0.915 | 0.388 | 87             | 103  | 90   | 36            | -44  | 1.83E-6 | 9.40E-6 | > 3.33E-5 |
| MDA-MB-468                                                   | 0.748 | 1.767 | 1.734                                 | 1.778 | 1.611 | 0.502 | 0.250 | 97             | 101  | 85   | -33           | -67  | 6.57E-7 | 1.75E-6 | 1.07E-5   |

**Figure S28.** Tabular list of the antineoplastic activity exhibited by the drug compound **3 (PT167, NSC 799315)** in the National Cancer Institute (NCI) Developmental Therapeutics Program (DTP) 60-cancer cell 5-dose testing with the Mean Optical Densities of the used vital stain sulforhodamine B (SRB) retained in the cells given. **Percent Growth, GI50 (Growth Inhibition 50%), TGI (Total Growth Inhibition = 0% Growth), and LC50 (Lethal Concentration 50% = -50% Growth)** are given in linear concentration units.



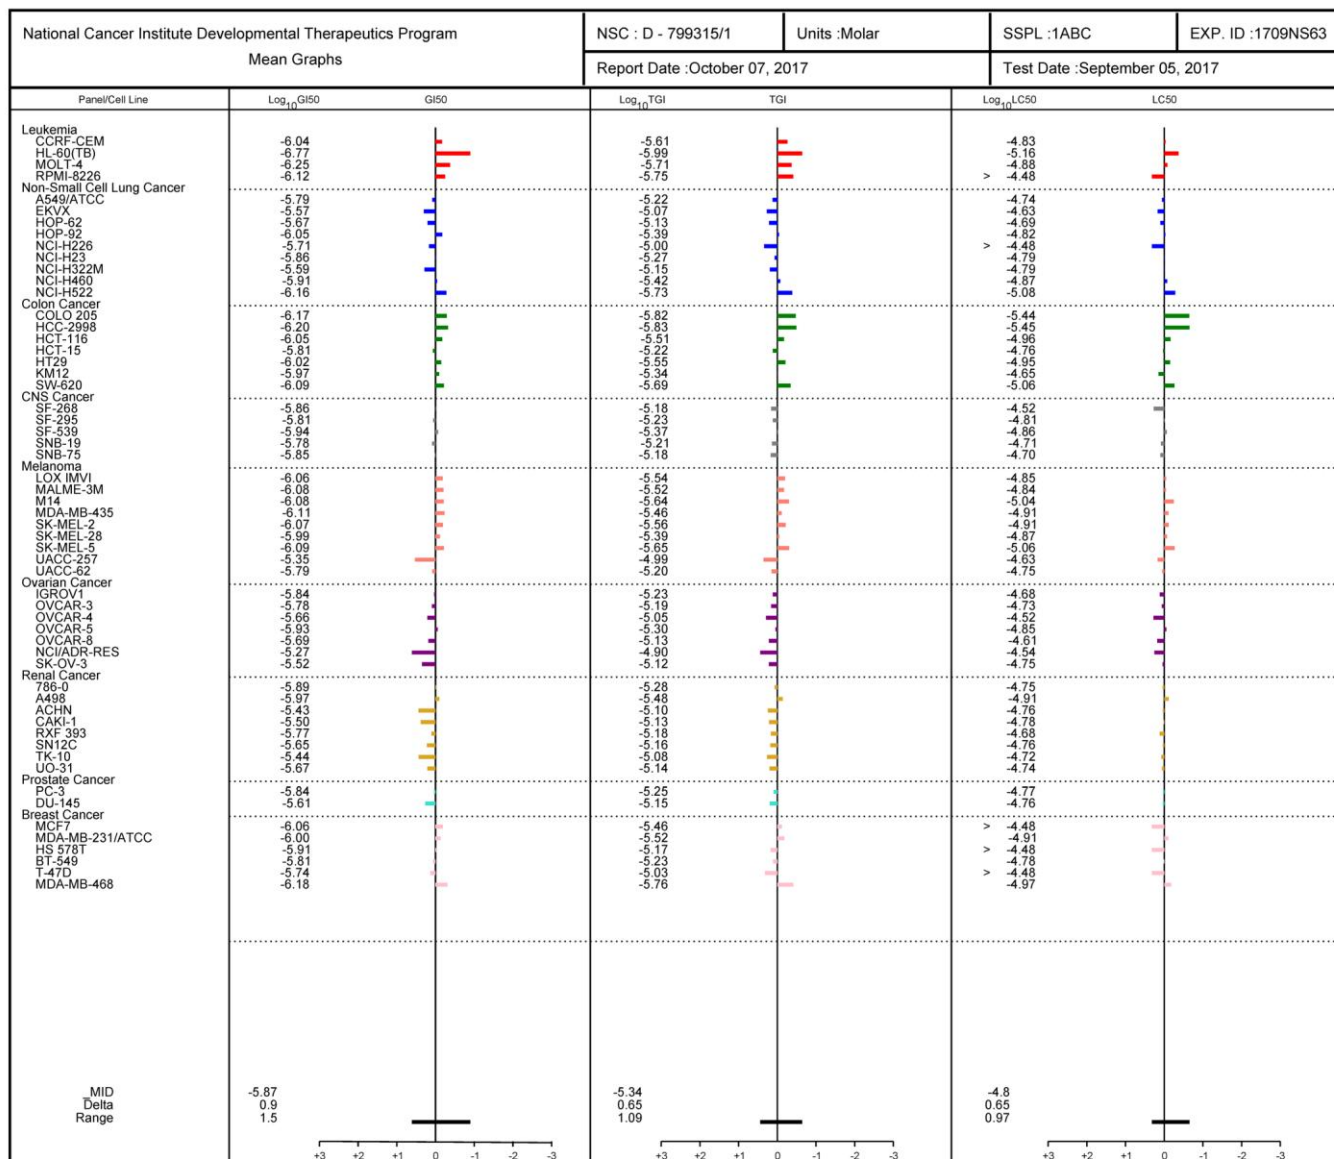

**Figure S29.** Graphic table presentation of the antineoplastic activity exhibited by the drug compound **3** (PT167, NSC 799315) in the National Cancer Institute (NCI) Developmental Therapeutics Program (DTP) 60-cancer cell 5-dose testing with the **Percent Growth**, **GI50** (**Growth Inhibition 50%**), **TGI** (**Total Growth Inhibition = 0% Growth**), and **LC50** (**Lethal Concentration 50% = -50% Growth**) given in linear concentration units. This is the summary of the results expressed in log<sub>10</sub> units. The defined tumor inhibition criterion (**GI50**, **TGI**, or **LC50**) is recalculated in log<sub>10</sub> expression, and the colored bars which indicate then the sensitivity of the individual tumor cell line to the agent are given, but in log<sub>10</sub> units. **Bar to the left: less sensitive**

than mean; Bar to the right: more sensitive than mean. The most important feature is at the bottom of the page: the **MID (Mean of Inhibition Data)** indicates the mean concentration for all tested cell lines required for the drug to reach the defined tumor inhibition criterion (**GI50**, **TGI**, or **LC50**). It is given in **Log<sub>10</sub>GI50**, **Log<sub>10</sub>TGI** and **Log<sub>10</sub>LC50**. From that values the corresponding **MID** is calculated. The more negative the **MID**, the more potent is the drug. The **MID** can be transformed from logarithmic into linear concentrations by the formula:  $c = 10^{\text{MID}}$ .
